# Supplementary material for: Genomic epidemiology of COVID-19 in care homes in the East of England
Source: bioRxiv or medRxiv preprint supplement (doi:10.1101/2020.08.26.20182279), 2021-02-15
Supplement: Supplementary file [file 2020.08.26.20182279-1.pdf]

# Appendix

## COVID-19 infection dynamics in care homes in the East of England: a retrospective genomic epidemiology study

William L. Hamilton<sup>\*1,2,+</sup>, Gerry Tonkin-Hill<sup>\*3</sup>, Emily Smith<sup>4</sup>, Charlotte J. Houldcroft<sup>5</sup>, Ben Warne<sup>1,2</sup>, Luke W. Meredith<sup>5</sup>, Myra Hosmillo<sup>5</sup>, Aminu S. Jahun<sup>5</sup>, Martin D. Curran<sup>5</sup>, Surendra Parmar<sup>5</sup>, Laura G. Caller<sup>5,6</sup>, Sarah L. Caddy<sup>5</sup>, Fahad A. Khokhar<sup>1</sup>, Anna Yakovleva<sup>5</sup>, Grant Hall<sup>5</sup>, Theresa Feltwell<sup>5</sup>, Malte L. Pinckert<sup>5</sup>, Iliana Georgana<sup>5</sup>, Yasmin Chaudhry<sup>5</sup>, Nicholas M. Brown<sup>7,2</sup>, Sónia Gonçalves<sup>3</sup>, Roberto Amato<sup>3</sup>, Ewan M. Harrison<sup>3</sup>, Mathew A. Beale<sup>3</sup>, Michael Spencer Chapman<sup>3,8</sup>, David K. Jackson<sup>3</sup>, Ian Johnston<sup>3</sup>, Alex Alderton<sup>3</sup>, John Sillitoe<sup>3</sup>, Cordelia Langford<sup>3</sup>, Gordon Dougan<sup>1</sup>, Sharon J. Peacock<sup>1</sup>, Dominic P. Kwiatkowski<sup>3</sup>, Ian Goodfellow<sup>5</sup>, M. Estée Török<sup>1,2,+</sup>, COVID-19 Genomics Consortium UK<sup>9</sup>

\* contributed equally

+ Corresponding authors

### Affiliations

1. University of Cambridge, Department of Medicine, Cambridge, UK
2. Cambridge University Hospitals NHS Foundation Trust, Departments of Infectious Diseases and Microbiology, Cambridge UK
3. Wellcome Sanger Institute, Hinxton, UK
4. Cambridgeshire County Council, UK
5. University of Cambridge, Department of Pathology, Division of Virology, Cambridge, UK
6. The Francis Crick Institute, London, UK
7. Public Health England Clinical Microbiology and Public Health Laboratory, Cambridge UK
8. Department of Haematology, Hammersmith Hospital, Imperial College Healthcare NHS Trust, London, UK
9. [www.cogconsortium.uk](http://www.cogconsortium.uk)

### Correspondence

William Hamilton [will.l.hamilton@gmail.com](mailto:will.l.hamilton@gmail.com)

M. Estée Török [et317@cam.ac.uk](mailto:et317@cam.ac.uk)

|    |                                                                                            |           |
|----|--------------------------------------------------------------------------------------------|-----------|
| 1  | <b>Table of Contents</b>                                                                   |           |
| 2  | <b>Supplementary Methods</b> .....                                                         | <b>4</b>  |
| 3  | <b>Diagnostic testing, metadata collection and genome sequencing</b> .....                 | <b>4</b>  |
| 4  | <b>Sample selection</b> .....                                                              | <b>4</b>  |
| 5  | <b>Identifying care home residents</b> .....                                               | <b>5</b>  |
| 6  | <i>Step 1: Search terms in patient address fields</i> .....                                | <b>5</b>  |
| 7  | <i>Step 2: Matching location names to CQC registered care facilities</i> .....             | <b>5</b>  |
| 8  | <i>Step 3: Manual inspection and data clean up</i> .....                                   | <b>6</b>  |
| 9  | <i>Step 4: Linking care home addresses to CQC registered care homes</i> .....              | <b>7</b>  |
| 10 | <b>Linking care home data to CUH acute medical testing data</b> .....                      | <b>7</b>  |
| 11 | <b>Selecting randomised sample of non-care home residents as comparison group</b> .....    | <b>8</b>  |
| 12 | <b>Care home viral phylogenetics and cluster analysis</b> .....                            | <b>9</b>  |
| 13 | <b>Lineage assignment</b> .....                                                            | <b>10</b> |
| 14 | <b>Clustering</b> .....                                                                    | <b>10</b> |
| 15 | <b>CUH HCW-Care home resident cluster analysis</b> .....                                   | <b>10</b> |
| 16 | <b>Literature cited in supplementary methods</b> .....                                     | <b>11</b> |
| 17 | <b>UK care home testing policy timeline</b> .....                                          | <b>15</b> |
| 18 | <b>Flow diagram for identifying care homes from Cambridge-COGUK metadata</b> .....         | <b>16</b> |
| 19 | <b>Breakdown of main organisations submitting samples to Cambridge PHE Laboratory over</b> |           |
| 20 | <b>study period</b> .....                                                                  | <b>17</b> |
| 21 | <b>Breakdown of main organisations submitting samples to Cambridge PHE Laboratory over</b> |           |
| 22 | <b>study period per week</b> .....                                                         | <b>19</b> |
| 23 | <b>Care home locations by county, showing nursing and residential homes</b> .....          | <b>20</b> |
| 24 | <b>Distribution of cases per care home for nursing and residential homes</b> .....         | <b>21</b> |
| 25 | <b>Case numbers in residential and nursing homes</b> .....                                 | <b>22</b> |
| 26 | <b>Positive cases per week per care home</b> .....                                         | <b>23</b> |
| 27 | <b>Proportion of weekly positives from care home residents</b> .....                       | <b>24</b> |
| 28 | <b>Case numbers from care homes and non-care home residents per week</b> .....             | <b>25</b> |
| 29 | <b>Case numbers tested at CUH by infection type</b> .....                                  | <b>26</b> |
| 30 | <b>Care home residents per week showing genome sequencing site</b> .....                   | <b>27</b> |
| 31 | <b>Distribution of pairwise SNP differences between care home samples</b> .....            | <b>28</b> |
| 32 | <b>Viral lineage composition in care home patients by week</b> .....                       | <b>29</b> |
| 33 | <b>Viral lineage composition in sub-sample of non care home patients by week</b> .....     | <b>30</b> |
| 34 | <b>Histogram of pairwise transmission probabilities between care home samples</b> .....    | <b>31</b> |
| 35 | <b>Transmission probability threshold vs number of care home clusters</b> .....            | <b>32</b> |
| 36 | <b>Pairwise SNP difference distribution within clusters</b> .....                          | <b>33</b> |

|   |                                                                                                  |           |
|---|--------------------------------------------------------------------------------------------------|-----------|
| 1 | <b><i>Pairwise date difference distribution within clusters.....</i></b>                         | <b>34</b> |
| 2 | <b><i>Transmission links identified between two nearby care homes and several healthcare</i></b> |           |
| 3 | <b><i>workers .....</i></b>                                                                      | <b>35</b> |
| 4 | <b><i>Cambridge COG-UK IDs for all samples analysed in this study.....</i></b>                   | <b>36</b> |
| 5 | <b><i>COG-UK authors .....</i></b>                                                               | <b>44</b> |
| 6 |                                                                                                  |           |
| 7 |                                                                                                  |           |

## 1 **Supplementary Methods**

### 2 **Diagnostic testing, metadata collection and genome sequencing**

3 For details on diagnostic testing, patient metadata collection and nanopore genome sequencing see  
4 (Meredith et al., 2020). Briefly, the Public Health England (PHE) Clinical Microbiology and Public Health  
5 Laboratory (CMPHL) in Cambridge used an in-house generated and validated one-step RT q-PCR assay  
6 detecting a 222-bp region of the RdRp genes, along with an MS2 bacteriophage internal extraction  
7 control, using the Rotorgene™ PCR instrument. Samples that generated a Ct value  $\leq 36$  were  
8 considered positive. Samples from Cambridge University Hospitals NHS Foundation Trust (CUH) and a  
9 selection of East of England (EoE) samples were sequenced on site by nanopore to provide rapid  
10 information on hospital acquired infections (Meredith et al., 2020). Nanopore sequencing took place  
11 in the Division of Virology, Department of Pathology, University of Cambridge, following the  
12 ARTICnetwork V3 protocol and assembled using the ARTICnetwork assembly pipeline. The remaining  
13 EoE samples, where available, were sent to the Wellcome Sanger Institute (WSI) for sequencing.

14  
15 Sequencing at WSI used Illumina technology. cDNA was generated from SARS-CoV-2 viral nucleic acid  
16 extracts and subsequently amplified to produce 400nt amplicons tiling the viral genome using V3  
17 nCov-2019 primers (ARTIC). This was followed by Illumina library generation using the NEBNext Ultra  
18 II DNA Library Prep Kit for Illumina (New England Biolabs Inc, Cat. No. E7645L). Libraries were amplified  
19 with KAPA HiFi Ready Mix (Kapa Biosystems, Cat. No. 07958927001) and uniquely indexed with a 100  
20  $\mu\text{M}$  i5 and i7 primer mix (50  $\mu\text{M}$  each) (Integrated DNA Technologies) to allow multiplexing of up to  
21 384 SARS-CoV-2 viral extracts into one sequencing pool. The PCR products were pooled in equal  
22 volume and purified with an AMPure XP workflow (Beckman Coulter, Cat. No. A63880). The purified  
23 pool was quantified by qPCR (Illumina Library Quantitation Complete kit, Cat. No. KK4824) and  
24 sequenced on one lane of an Illumina NovaSeq SP flow cell (Illumina Inc, NovaSeq 6000 SP Reagent Kit  
25 v1.5 (500 cycles), Cat. No. 20028402), with XP workflow (Illumina Inc, NovaSeq XP 2 lane kit v1.5, Cat.  
26 No. 20043130). Genomes were generated for each library's sequencing data using bwa mem (Li, 2013)  
27 for alignment with MN908947.3 (Wu et al., 2020) as reference, samtools (Li et al., 2009) for pileup and  
28 ivar (Grubaugh et al., 2019) for trimming and consensus generation, all orchestrated by the ncov2019-  
29 artic-nf pipeline (Bull, 2020).

### 30 **Sample selection**

31 As described in (Meredith et al., 2020), patient metadata was downloaded daily from the CUH  
32 computer system (Epic Systems, Verona, WI, USA) and metadata manipulations were performed in R

1 (v 3.6.2) using the *tidyverse* packages (v 1.3.0) installed on Trust computers. Positive samples were  
2 collected and assigned either for sequencing on site by nanopore (focusing on CUH samples and  
3 randomised selection of EoE samples), or sent to WSI for Illumina sequencing. Metadata was uploaded  
4 weekly to the MRC CLIMB system as part of the COG-UK consortium. Samples included healthcare  
5 workers (HCW) tested in the CUH HCW screening programme (Jones et al., 2020; Rivett et al., 2020),  
6 all of which were sequenced on site by nanopore.

## 7 **Identifying care home residents**

8 We identified care home residents using a two-stage data mining approach followed by manual  
9 inspection and linking putative care home addresses to care homes registered to the Care Quality  
10 Commission (CQC).

### 11 ***Step 1: Search terms in patient address fields***

12 We searched patient address lines 1 and 2 for the following list of key phrases (not case sensitive) in  
13 their electronic healthcare records; if any phrases were present the patient was labelled as being from  
14 a care home:

- 15 · "residential home"
- 16 · "care home"
- 17 · "nursing home"
- 18 · "care centre"
- 19 · "care hom"
- 20 · "nursing hom"
- 21 · "residential hom"
- 22 · "carehome"

23 This identified 765 patients as being care home residents.

### 24 ***Step 2: Matching location names to CQC registered care facilities***

25 Many care homes do not have the above list of phrases in their address names. To capture these  
26 facilities we used the publicly available database of care homes registered to the CQC, the  
27 independent regulator of health and adult social care in England. All organisations providing  
28 accommodation for persons who require nursing or personal care must be registered with the CQC,  
29 including care homes with or without nursing care (*What Is Registration? | Care Quality Commission,*  
30 n.d.). Details of the CQC registration scope can be found in "The scope of registration (Registration

1 under the Health and Social Care Act 2008)", March 2015, available at this link as of 24<sup>th</sup> June 2020:  
2 (Quality Commission, 2015).  
3

4 We accessed the file "CQC care directory – with filters (1 June 2020)" on 23<sup>rd</sup> June 2020 from the CQC  
5 website: (*Using CQC Data | Care Quality Commission, n.d.*), and applied the following filters:

- 6 · Total facilities in CQC database: N = 49,516
- 7 · "Carehome?" column filtered to "Y": N = 15,507\*
- 8 · We only included care homes for which "Location Postal Code" column matched at least 1  
9 postcode from the dataset of 6,600 patients included in our study, yielding N = 444 care  
10 homes. Following manual review and consistifying postcodes with the sample metadata, we  
11 used a set of 469 CQC care homes.\*\*

12  
13 \*Filtering using the "carehome?" column was based on advice given after correspondence with the  
14 CQC.

15 \*\* Requiring CQC registered care homes to match postcodes from the patient dataset minimised the  
16 number of "false positives" – patients whose address name matched a CQC registered care home  
17 name by coincidence. 25 CQC-registered care homes were added following manual review of the  
18 identified putative care home residents, who had a different postcode documented in the electronic  
19 healthcare records for the same care home, yielding the final "CQC EoE care home search set" of 469  
20 care homes.

21  
22 We then used the values from the "Location name" column of the filtered CQC dataset (i.e. the care  
23 home facility names) as search phrases for address line 1 in the patient database. Any patients with  
24 exactly matching phrases were labelled as care home residents. This increased the number of care  
25 home residents identified by a further 382 to 1,147, i.e. around one third of care home residents were  
26 identified using CQC facility names and would have been missed by relying on generic care home-  
27 related search phrases alone.

### 28 ***Step 3: Manual inspection and data clean up***

29 Address lines for the non-care home patients were manually inspected; this identified a further 89  
30 care home residents. Most of these had not been detected in steps 1 and 2 due to spelling or  
31 formatting issues with the patient addresses (e.g. short-hand abbreviations used for care home  
32 names, or inclusion of extra details like flat number meaning the string did not match a CQC care home  
33 name exactly).

1

2 Next, address lines for the care home residents were manually inspected and 14 were deemed not to  
3 be care home residents. Most of these were due to unrelated locations sharing the same address  
4 name as a CQC registered care home. The manual filtering steps thus yielded a care home resident  
5 count of  $1,147 + 89 - 14 = 1,222$ . Address line 1 for all 1,222 care home residents was manually  
6 inspected and formatted to ensure residents from the same care home had matching terms in this  
7 column. This was necessary due to discrepant address entrance formats for identical care homes;  
8 without this step, residents from the same care home would be incorrectly assigned to different  
9 anonymised care home codes.

#### 10 ***Step 4: Linking care home addresses to CQC registered care homes***

11 First line of patient address and postcodes were matched to care home names and postcodes from  
12 the CQC EoE care home search set (described above). Any discrepancies (care homes not matching  
13 the CQC data) were manually inspected and in the majority of cases the discrepancy could be  
14 reconciled (e.g. alternative name or postcode used for the same care home). In 55 cases a “care home”  
15 was reclassified to non-care home, either because the address was independent housing with a  
16 matching name to a care home by coincidence, or because a care facility was determined by CQC  
17 definitions to not be a care home - e.g. several mental health community hospitals, drug rehabilitation  
18 centres, and supported living environments were excluded. Ultimately all 337 care homes included in  
19 the study were linked to CQC data; in two cases the care home had been previously registered but  
20 had since been “archived”, and the most recent CQC data for defining whether residential or nursing  
21 care was being provided was used.

22

23 Care home location IDs assigned by the CQC were turned into anonymised codes (format: CARE  
24 followed by an ascending 4-digit numeric code). We determined whether care homes were  
25 “residential homes” or “nursing homes” using the CQC data column “Service type - Care home service  
26 with nursing” filtered to “Y” for care homes with nursing, and column “Service type - Care home  
27 service without nursing” = “Y” for care homes without nursing (“residential homes”). If both fields  
28 were “Y” then the care home was coded as being a nursing home.

#### 29 **Linking care home data to CUH acute medical testing data**

30 The dataset of 7,407 PCR-positive samples with metadata were collected prospectively as part of the  
31 COG-UK study. Data on CUH acute care testing, including categorisations of whether infections were  
32 community or hospital acquired (definitions provided in (Meredith et al., 2020)), were collected

1 separately as part of CUH and national monitoring. In the study period, 464 patients had tested  
2 positive for COVID-19 at CUH.

3

4 When merging the metadata collected for COG-UK (including the above care home categorisations)  
5 with CUH acute testing data we identified 23 samples that had tested positive in CUH that were not  
6 in the COG-UK dataset. 21/23 of these were tested on the SAMBA platform at CUH (Collier et al.,  
7 2020), which is not PCR-based and sequencing is currently not possible for these samples due to rapid  
8 RNA degradation. For technical reasons SAMBA results were not included in the data collected  
9 prospectively in the COG-UK study. The remaining two discrepancies were not captured in our  
10 prospective electronic patient record downloads, which likely reflects periods where the download  
11 processes and coding methods were in flux. Of the 23 missing samples, none were determined as  
12 being community-onset care home associated infections (20 were community-onset community-  
13 associated, two were hospital-onset indeterminate healthcare-associated, and one was a healthcare  
14 worker). They therefore are not included in the numbers presented on care home resident ICU  
15 admission and mortality for CUH patients in Table 1, but are depicted with the above categorisations  
16 in the CUH epidemic curve shown in Figure 2.

## 17 **Selecting randomised sample of non-care home residents as comparison group**

18 We selected a randomised sample of non-care home residents to use as a control group for  
19 comparison against the care home resident group. Because this group was intended to be  
20 representative of non-care home community-acquired transmission, we applied the following  
21 exclusion criteria prior to randomisation:

- 22 • Patient address available
- 23 • Not one of the identified care home residents
- 24 • Not a HCW (information only available for people tested at CUH)
- 25 • Not a CUH case of indeterminate, suspected or definite hospital acquired infection
- 26 • Not living in a long-term care facility other than a care home (e.g. mental health  
27 hospital, rehabilitation unit, etc)
- 28 • Not living in a prison

29 We attempted to have a roughly equivalent representation of nanopore and WSI sequenced samples  
30 as present in the care home database. Samples were selected using the R randomisation command  
31 *sample\_n()* from available genomes in the CLIMB database passing QC filters. Having identified 698  
32 samples, any cases with matching addresses that had been excluded were added to yield the final set  
33 of 700 non-care home genomes for comparison. Of the 700 non-care home samples included, we note



1 that there were five instances of pairs of samples sharing the same address; in all five cases the  
2 pairwise SNP difference was zero or 1, and in 4/5 cases the people shared the same surname.

### 3 **Care home viral phylogenetics and cluster analysis**

4 Consensus fasta sequences were downloaded from the MRC-CLIMB website  
5 (<https://www.climb.ac.uk/>) (Connor et al., 2016). Genomes were de-duplicated (1 genome per  
6 person) and passed through quality control (QC) filtering using the same criteria as in (Meredith et al.,  
7 2020): genome size >29Kb, N count <2990 (i.e. >90% coverage).

8

9 The 700 de-duplicated viral genomes from care home residents passing QC were aligned using MAFFT  
10 (v 7.458) (Kato & Standley, 2013) with default settings. Command:

```
11 "/PATH/mafft" --retree 2 --inputorder "multi_fasta_filename.fasta" > "alignment_filename"
```

12

13 A SNP difference matrix was produced from the alignment using *snp-dists* v 0.7.0 (*Tseemann/Snp-*  
14 *Dists: Pairwise SNP Distance Matrix from a FASTA Sequence Alignment*, n.d.) installed in a conda  
15 environment, run with the following command:

```
16 snp-dists -c alignment_filename.aln > snp_diff_matrix_filename.csv
```

17

18 The SNP difference matrix was manipulated in R using the *Matrix* and *tidyverse* packages to generate  
19 the SNP difference histogram and boxplots.

20

21 Phylogenetic trees were generated using IQ-TREE (v 1.6.12 built Aug 15 2019). An alignment was  
22 generated as above including a reference genome from Wuhan, China, collected December 2019 and  
23 used to root the tree (GISAID ID: EPI\_ISL\_402123). The IQ-TREE Model Finder Plus option was used  
24 (Kalyaanamoorthy et al., 2017) which searches from a database of available nucleotide substitution  
25 models and selects the best fit to the analysis, command line:

```
26 ~/PATH/iqtree -s alignment_filename -m MFP
```

27

28 The best-fit nucleotide substitution model according to BIC was GTR+F+R2. The tree in Figure 3 was  
29 produced using this model with the ultrafast bootstrap option (Hoang et al., 2018) run through 1,000  
30 tree iterations to estimate branch support values, using command:

```
31 ~/PATH/iqtree -s alignment_filename -m GTR+F+R2 -bb 1000
```

32

1 Newick trees were manipulated in *FigTree* (v 1.4.4) to root on the Wuhan sample and put in increasing  
2 node order. Trees were visualised initially using the microreact online tool (Argimón et al., 2016), and  
3 Figure 3 was produced in R using *ggtree* (v 2.0.4) (Yu et al., 2017).

#### 4 **Lineage assignment**

5 Viral lineages were assigned using the Pangolin COVID-19 Lineage Assigner web utility (*COG-UK*, n.d.).  
6 Analysis was performed with Pangolin (Rambaut et al., 2020) version 1.1.14, lineages version 2020-  
7 05-19-2. Contextual information about lineages was taken from (*SARS-CoV-2 Lineages*, n.d.), accessed  
8 24/07/2020.

#### 9 **Clustering**

10 Clusters were produced using an adaptation of the *transcluster* package (*Gtonkinhill/Fasttranscluster*,  
11 n.d.; Stimson et al., 2019), assuming a viral mutation rate of  $1e-3$  substitutions/site/year (Fauver et  
12 al., 2020) and serial interval of five days (He et al., 2020; Zhang et al., 2020). We used days between  
13 first positive sampling date as a proxy for serial interval (which is the date of symptom onset, rather  
14 than swab positivity). Where collection date was missing we used the date the sample was received  
15 in the Cambridge PHE laboratory. The resulting pairwise transmission probabilities were used to  
16 generate a pairwise distance matrix and clustering was performed using single linkage hierarchical  
17 clustering with the R *hclust* function. Links were only considered if they involved residents from the  
18 same care home.

19  
20 We explored the relationship between the probability of infections being linked by  $\leq 2$  intermediate  
21 hosts and the resulting number of care home clusters (Appendix pp 31-32). A higher threshold leads  
22 to more care home clusters, with greater likelihood of linked transmission within each cluster than  
23 when using a lower threshold. We pragmatically chose a cut-off of 15% probability, yielding the within-  
24 cluster SNP and date difference distributions shown in Appendix pp 33-34; the majority of pairwise  
25 comparisons within clusters were zero or 1 SNP different and <14 days apart.

#### 26 **CUH HCW-Care home resident cluster analysis**

27 To investigate transmission between healthcare workers (HCW) and care home residents we focused  
28 on CUH cases, where we had richest metadata including HCW status.

29

30 Of 6,600 PCR-positive patients, 91 had been identified as HCW. 74 of these were from the CUH HCW  
31 screening programme (which includes symptomatic, asymptomatic and household contact arms)

1 (Jones et al., 2020; Rivett et al., 2020) and 17 had presented acutely to CUH medical services, and been  
2 identified as HCW during their initial medical clerking and subsequent note reviews. Of the 91 HCW,  
3 76 had genomes available for analysis (breakdown: 56 samples identified through the CUH HCW  
4 screening programme, 9 CUH HCW who presented to acute medical services at CUH, and 11 HCW  
5 from community settings (paramedics and care home workers) that had been flagged as HCW through  
6 admission clerkings). Of 464 CUH cases in the study period, 71 were care home residents and 54 of  
7 these had available genomes for analysis. The total combined analysis set of CUH HCW and care home  
8 residents was therefore  $76+54 = 130$ .

9

10 The 130 genomes were aligned using MAFFT and underwent the same cluster analysis using the  
11 *transcluster* algorithm as described above. We focused on clusters containing at least one of both a  
12 HCW and a care home resident. Transmission links between care homes were excluded as were links  
13 between HCWs. We allowed for HCWs to belong to multiple clusters from different care homes to  
14 allow for the possibility of a HCW seeding multiple care home infections. We identified 21 clusters  
15 involving both care home residents and HCWs. Of the 54 care home residents, 38 had links with HCWs  
16 within the 0.15 probability threshold. Medical notes for potential care home resident-HCW  
17 transmission pairs were reviewed by author WLH as described in (Meredith et al., 2020), with cases  
18 being categorised as strongly linked epidemiologically (e.g. the HCW documented in the care home  
19 residents' medical notes); possibly linked (e.g. both working in the hospital at the same time but not  
20 in the same wards); or no evidence of an epidemiological link.

## 21 **Literature cited in supplementary methods**

22 Argimón, S., Abudahab, K., Goater, R. J. E., Fedosejev, A., Bhai, J., Glasner, C., Feil, E. J., Holden, M. T.  
23 G., Yeats, C. A., Grundmann, H., Spratt, B. G., & Aanensen, D. M. (2016). Microreact: visualizing  
24 and sharing data for genomic epidemiology and phylogeography. *Microbial Genomics*, 2(11),  
25 e000093. <https://doi.org/10.1099/mgen.0.000093>

26 Bull, M. (2020). *A Nextflow pipeline for running the ARTIC network's fieldbioinformatics tools with a*  
27 *focus on ncov2019*. <https://github.com/connor-lab/ncov2019-artic-nf>

28 *COG-UK*. (n.d.). Retrieved July 30, 2020, from <https://pangolin.cog-uk.io/>

29 Collier, D., Assennato, S., Sithole, N., Sharrocks, K., Ritchie, A., Ravji, P., Routledge, M., Sparkes, D.,  
30 Skittrall, J., Warne, B., smielewska, A., RAMSEY, I., Goel, N., CURRAN, M., ENOCH, D., TASSELL,  
31 R., LINEHAM, M., VAGHELA, D., LEONG, C., & Gupta, R. (2020). Rapid point of care nucleic acid  
32 testing for SARS-CoV-2 in hospitalised patients: a clinical trial and implementation study. *Cell*

1        *Reports Medicine*, 100062. <https://doi.org/10.1101/2020.05.31.20114520>

2        Connor, T. R., Loman, N. J., Thompson, S., Smith, A., Southgate, J., Poplawski, R., Bull, M. J.,  
3        Richardson, E., Ismail, M., Thompson, S. E., Kitchen, C., Guest, M., Bakke, M., Sheppard, S. K., &  
4        Pallen, M. J. (2016). CLIMB (the Cloud Infrastructure for Microbial Bioinformatics): an online  
5        resource for the medical microbiology community. *Microbial Genomics*, 2(9), e000086.  
6        <https://doi.org/10.1099/mgen.0.000086>

7        *Coronavirus testing - GOV.UK*. (n.d.). Retrieved July 30, 2020, from  
8        <https://www.gov.uk/government/news/coronavirus-testing>

9        *COVID-19 policy tracker | The Health Foundation*. (n.d.). Retrieved July 30, 2020, from  
10        [https://www.health.org.uk/news-and-comment/charts-and-infographics/covid-19-policy-](https://www.health.org.uk/news-and-comment/charts-and-infographics/covid-19-policy-tracker)  
11        tracker

12        Fauver, J. R., Petrone, M. E., Hodcroft, E. B., Shioda, K., Ehrlich, H. Y., Watts, A. G., Vogels, C. B. F.,  
13        Brito, A. F., Alpert, T., Muyombwe, A., Razeq, J., Downing, R., Cheemarla, N. R., Wyllie, A. L.,  
14        Kalinich, C. C., Ott, I. M., Quick, J., Loman, N. J., Neugebauer, K. M., ... Grubaugh, N. D. (2020).  
15        Coast-to-Coast Spread of SARS-CoV-2 during the Early Epidemic in the United States. *Cell*,  
16        181(5), 990–996. <https://doi.org/10.1016/j.cell.2020.04.021>

17        Grubaugh, N. D., Gangavarapu, K., Quick, J., Matteson, N. L., De Jesus, J. G., Main, B. J., Tan, A. L.,  
18        Paul, L. M., Brackney, D. E., Grewal, S., Gurfield, N., Van Rompay, K. K. A., Isern, S., Michael, S.  
19        F., Coffey, L. L., Loman, N. J., & Andersen, K. G. (2019). An amplicon-based sequencing  
20        framework for accurately measuring intrahost virus diversity using PrimalSeq and iVar. *Genome*  
21        *Biology*, 20(1), 1–19. <https://doi.org/10.1186/s13059-018-1618-7>

22        *gtonkinhill/fasttranscluster*. (n.d.). Retrieved July 30, 2020, from  
23        <https://github.com/gtonkinhill/fasttranscluster>

24        He, X., Lau, E. H. Y., Wu, P., Deng, X., Wang, J., Hao, X., Lau, Y. C., Wong, J. Y., Guan, Y., Tan, X., Mo,  
25        X., Chen, Y., Liao, B., Chen, W., Hu, F., Zhang, Q., Zhong, M., Wu, Y., Zhao, L., ... Leung, G. M.  
26        (2020). Temporal dynamics in viral shedding and transmissibility of COVID-19. *Nature Medicine*,  
27        26(5), 672–675. <https://doi.org/10.1038/s41591-020-0869-5>

28        Hoang, D. T., Chernomor, O., von Haeseler, A., Minh, B. Q., & Vinh, L. S. (2018). UFBoot2: Improving  
29        the Ultrafast Bootstrap Approximation. *Molecular biology and evolution*. *Molecular Biology and*  
30        *Evolution*, 35(2), 518–522. <https://doi.org/10.5281/zenodo.854445>

1 Jones, N. K., Rivett, L., Sparkes, D., Forrest, S., Sridhar, S., Young, J., Pereira-Dias, J., Cormie, C., Gill,  
2 H., Reynolds, N., Wantoch, M., Routledge, M., Warne, B., Levy, J., Jiménez, W. D. C., Samad, F.  
3 N. B., McNicholas, C., Ferris, M., Gray, J., ... Weekes, M. P. (2020). Effective control of sars-cov-2  
4 transmission between healthcare workers during a period of diminished community prevalence  
5 of covid-19. *ELife*, *9*, 1–10. <https://doi.org/10.7554/eLife.59391>

6 Kalyaanamoorthy, S., Minh, B. Q., Wong, T. K. F., Von Haeseler, A., & Jermiin, L. S. (2017).  
7 ModelFinder: Fast model selection for accurate phylogenetic estimates. *Nature Methods*, *14*(6),  
8 587–589. <https://doi.org/10.1038/nmeth.4285>

9 Katoh, K., & Standley, D. M. (2013). MAFFT multiple sequence alignment software version 7:  
10 Improvements in performance and usability. *Molecular Biology and Evolution*, *30*(4), 772–780.  
11 <https://doi.org/10.1093/molbev/mst010>

12 Li, H. (2013). *Aligning sequence reads, clone sequences and assembly contigs with BWA-MEM*.  
13 *00*(00), 1–3. <http://arxiv.org/abs/1303.3997>

14 Li, H., Handsaker, B., Wysoker, A., Fennell, T., Ruan, J., Homer, N., Marth, G., Abecasis, G., & Durbin,  
15 R. (2009). The Sequence Alignment/Map format and SAMtools. *Bioinformatics*, *25*(16), 2078–  
16 2079. <https://doi.org/10.1093/bioinformatics/btp352>

17 Meredith, L. W., Hamilton, W. L., Warne, B., Houldcroft, C. J., Hosmillo, M., Jahun, A. S., Curran, M.  
18 D., Parmar, S., Caller, L. G., Caddy, S. L., Khokhar, F. A., Yakovleva, A., Hall, G., Feltwell, T.,  
19 Forrest, S., Sridhar, S., Weekes, M. P., Baker, S., Brown, N., ... Goodfellow, I. (2020). Rapid  
20 implementation of SARS-CoV-2 sequencing to investigate cases of health-care associated  
21 COVID-19: a prospective genomic surveillance study. *The Lancet Infectious Diseases*, *0*(0).  
22 [https://doi.org/10.1016/S1473-3099\(20\)30562-4](https://doi.org/10.1016/S1473-3099(20)30562-4)

23 Quality Commission, C. (2015). *The scope of registration*.

24 Rambaut, A., Holmes, E. C., O’Toole, Á., Hill, V., McCrone, J. T., Ruis, C., du Plessis, L., & Pybus, O. G.  
25 (2020). A dynamic nomenclature proposal for SARS-CoV-2 lineages to assist genomic  
26 epidemiology. *Nature Microbiology*. <https://doi.org/10.1038/s41564-020-0770-5>

27 Rivett, L., Sridhar, S., Sparkes, D., Routledge, M., Jones, N. K., Forrest, S., Young, J., Pereira-Dias, J.,  
28 Hamilton, W. L., Ferris, M., Torok, M. E., Meredith, L., Curran, M., Fuller, S., Chaudhry, A., Shaw,  
29 A., Samworth, R. J., Bradley, J. R., Dougan, G., ... Weekes, M. P. (2020). Screening of healthcare  
30 workers for SARS-CoV-2 highlights the role of asymptomatic carriage in COVID-19 transmission.

1 *ELife*, 9, 1–20. <https://doi.org/10.7554/eLife.58728>

2 *SARS-CoV-2 lineages*. (n.d.). Retrieved July 30, 2020, from <https://cov-lineages.org/descriptions.html>

3 Stimson, J., Gardy, J., Mathema, B., Crudu, V., Cohen, T., & Colijn, C. (2019). Beyond the SNP  
4 Threshold: Identifying Outbreak Clusters Using Inferred Transmissions. *Molecular Biology and*  
5 *Evolution*, 36(3), 587–603. <https://doi.org/10.1093/molbev/msy242>

6 *tseemann/snp-dists: Pairwise SNP distance matrix from a FASTA sequence alignment*. (n.d.).  
7 Retrieved July 30, 2020, from <https://github.com/tseemann/snp-dists>

8 *Using CQC data | Care Quality Commission*. (n.d.). Retrieved July 30, 2020, from  
9 <https://www.cqc.org.uk/about-us/transparency/using-cqc-data>

10 *What is registration? | Care Quality Commission*. (n.d.). Retrieved July 30, 2020, from  
11 <https://www.cqc.org.uk/guidance-providers/registration/what-registration>

12 Wu, F., Zhao, S., Yu, B., Chen, Y. M., Wang, W., Song, Z. G., Hu, Y., Tao, Z. W., Tian, J. H., Pei, Y. Y.,  
13 Yuan, M. L., Zhang, Y. L., Dai, F. H., Liu, Y., Wang, Q. M., Zheng, J. J., Xu, L., Holmes, E. C., &  
14 Zhang, Y. Z. (2020). A new coronavirus associated with human respiratory disease in China.  
15 *Nature*, 579(7798), 265–269. <https://doi.org/10.1038/s41586-020-2008-3>

16 Yu, G., Smith, D. K., Zhu, H., Guan, Y., & Lam, T. T. Y. (2017). Ggtree: an R Package for Visualization  
17 and Annotation of Phylogenetic Trees With Their Covariates and Other Associated Data.  
18 *Methods in Ecology and Evolution*, 8(1), 28–36. <https://doi.org/10.1111/2041-210X.12628>

19 Zhang, J., Litvinova, M., Wang, W., Wang, Y., Deng, X., Chen, X., Li, M., Zheng, W., Yi, L., Chen, X., Wu,  
20 Q., Liang, Y., Wang, X., Yang, J., Sun, K., Longini, I. M., Halloran, M. E., Wu, P., Cowling, B. J., ...  
21 Yu, H. (2020). Evolving epidemiology and transmission dynamics of coronavirus disease 2019  
22 outside Hubei province, China: a descriptive and modelling study. *The Lancet Infectious*  
23 *Diseases*, 20(7), 793–802. [https://doi.org/10.1016/S1473-3099\(20\)30230-9](https://doi.org/10.1016/S1473-3099(20)30230-9)

24

# 1 UK care home testing policy timeline

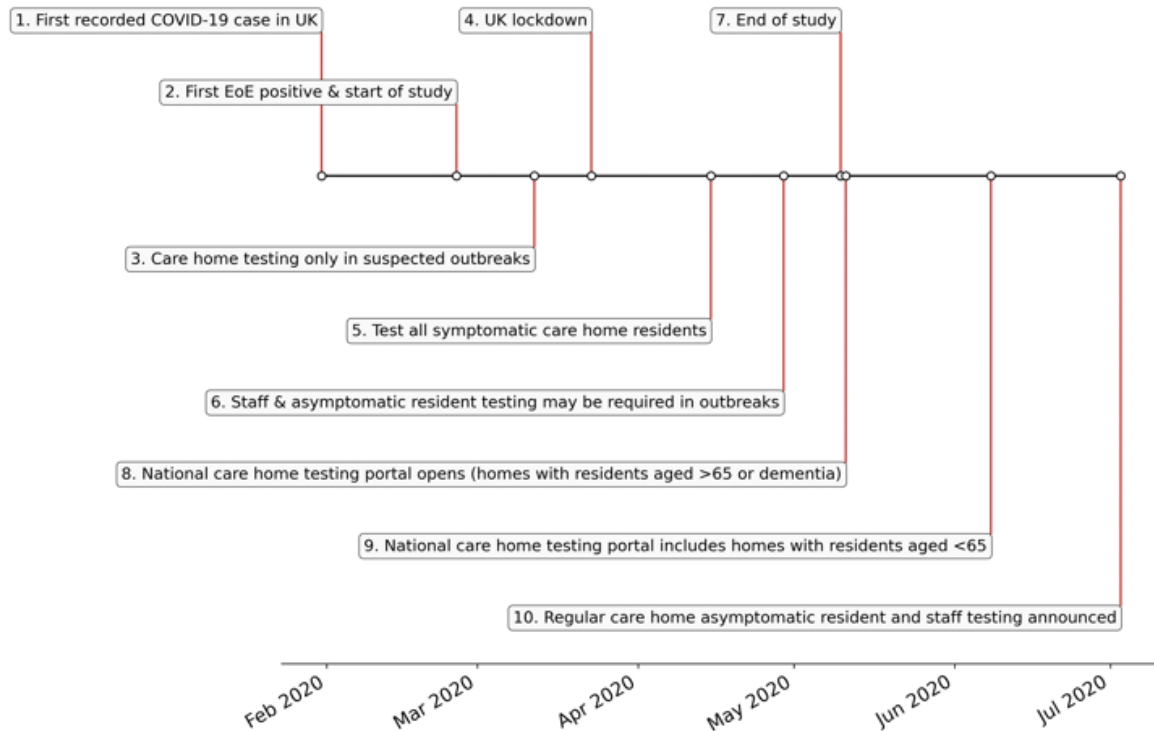

2

3

4

1. 31st January - first recorded case of covid-19 in the UK

5

2. 26th February - first case of COVID-19 in the East of England; start date of this study

6

3. 12<sup>th</sup> March – individuals in the community advised to self-isolate for 7 days, without testing. Testing only offered to care homes in the context of a suspected outbreak

7

8

4. 23rd March - UK lockdown officially begins

9

5. 15<sup>th</sup> April – action plan announced to test all symptomatic residents in care homes, plus testing of all residents prior to admission to care home from hospital

10

11

6. 29<sup>th</sup> April – testing guidance amended to reflect that asymptomatic as well symptomatic residents and staff in care homes may need to be tested as part of an outbreak

12

13

7. 10th May - end date of this study

14

8. 11<sup>th</sup> May – national whole care home testing portal (offering a single test to all staff and residents) goes live for care homes with residents aged 65 years and over or dementia patients

15

16

9. 8<sup>th</sup> June – national whole care home testing portal extends eligibility to care homes with residents aged under 65 years

17

18

10. 3<sup>rd</sup> July – announcement that regular asymptomatic testing for care home staff and residents will be rolled out through the national whole care home testing portal in July for homes with residents aged over 65 years or dementia patients

19

20

21

References: (*Coronavirus Testing - GOV.UK*, n.d.; *COVID-19 Policy Tracker | The Health Foundation*, n.d.)

# 1 Flow diagram for identifying care homes from Cambridge-COGUK metadata

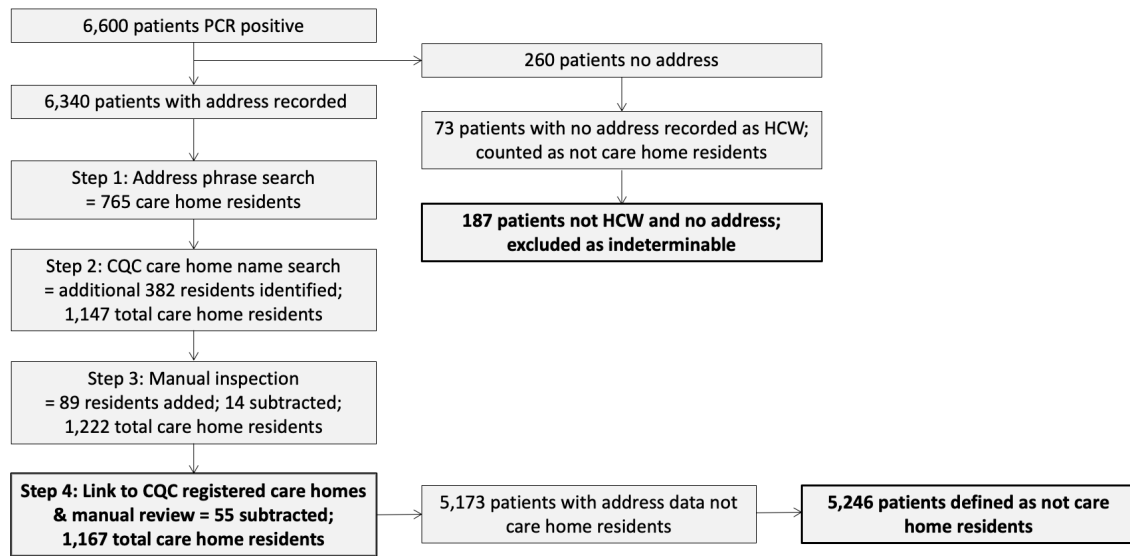

2  
3  
4  
5  
6  
7  
8  
9  
10  
11  
12  
13  
14  
15  
16

Steps for identifying care home residents from the dataset (full description in Appendix pp 5-7). First, we searched for phrase matches in the address field of the patient electronic healthcare records (“care home”, “nursing home”, etc). Second, we searched for care home names in the patient address field using a dataset of care homes from the Care Quality Commission (CQC). The resulting list was manually inspected and every care home included in the study was linked to a registered CQC care home, allowing us to use CQC coding of whether nursing care was or was not available at each care home (referred to as “nursing homes” and “residential homes” in this study, respectively). If the address information was incomplete (no postcode and/or no address line) then the case was excluded as impossible to determine whether or not the patient was from a care home, unless the person was known to be a healthcare worker (HCW), in which case it was assumed they were not a care home resident. This process yielded the final result of 1,167 care home residents from 337 care homes; 5,246 individuals that were not care home residents, and 187 individuals that were indeterminable.



1 **Breakdown of main organisations submitting samples to Cambridge PHE**  
 2 **Laboratory over study period**

3

| <b>Submitting site</b>                  | <b>Number of positive cases</b> |
|-----------------------------------------|---------------------------------|
| Southend University Hospital            | 888                             |
| Luton and Dunstable University Hospital | 691                             |
| Bedford Hospital                        | 668                             |
| Watford General Hospital                | 633                             |
| PHE East of England HPT                 | 513                             |
| Addenbrooke's Hospital                  | 512                             |
| Lister Hospital                         | 506                             |
| Colchester Hospital                     | 441                             |
| Ipswich Hospital                        | 420                             |
| Broomfield Hospital                     | 327                             |
| West Suffolk Hospital                   | 199                             |
| Basildon University Hospital            | 196                             |
| Herts Urgent Care Ltd                   | 97                              |
| Princess Alexandra Hospital             | 86                              |
| Royal Papworth Hospital                 | 71                              |
| Hinchingbrooke Hospital                 | 67                              |
| Commisceo Primary Care Solutions        | 63                              |
| Peterborough City Hospital              | 58                              |
| Milton Keynes Hospital                  | 53                              |
| EEAST COVID-19 Coordination Centre      | 32                              |
| PHL London                              | 19                              |
| Norfolk and Norwich University Hospital | 17                              |

|              |             |
|--------------|-------------|
| Unknown      | 11          |
| Other        | 32          |
| <b>Total</b> | <b>6600</b> |

1  
2  
3  
4  
5  
6  
7  
8  
9  
10

To maintain patient anonymity, sites that submitted samples from  $\leq 10$  people with positive test results are not shown and are counted as “Other”. Note that over the course of the study, some sites changed testing provider from CMPHL as further testing sites became available around the region. This explains some of the variation in the relative proportion of cases submitted from each site. The numbers reported here do not necessarily reflect total case numbers for each hospital or submitting organisation, as tests may have been performed elsewhere or metadata not collected in this study; the numbers are included purely to indicate where the samples included in this study originated from.

1 **Breakdown of main organisations submitting samples to Cambridge PHE**  
 2 **Laboratory over study period per week**

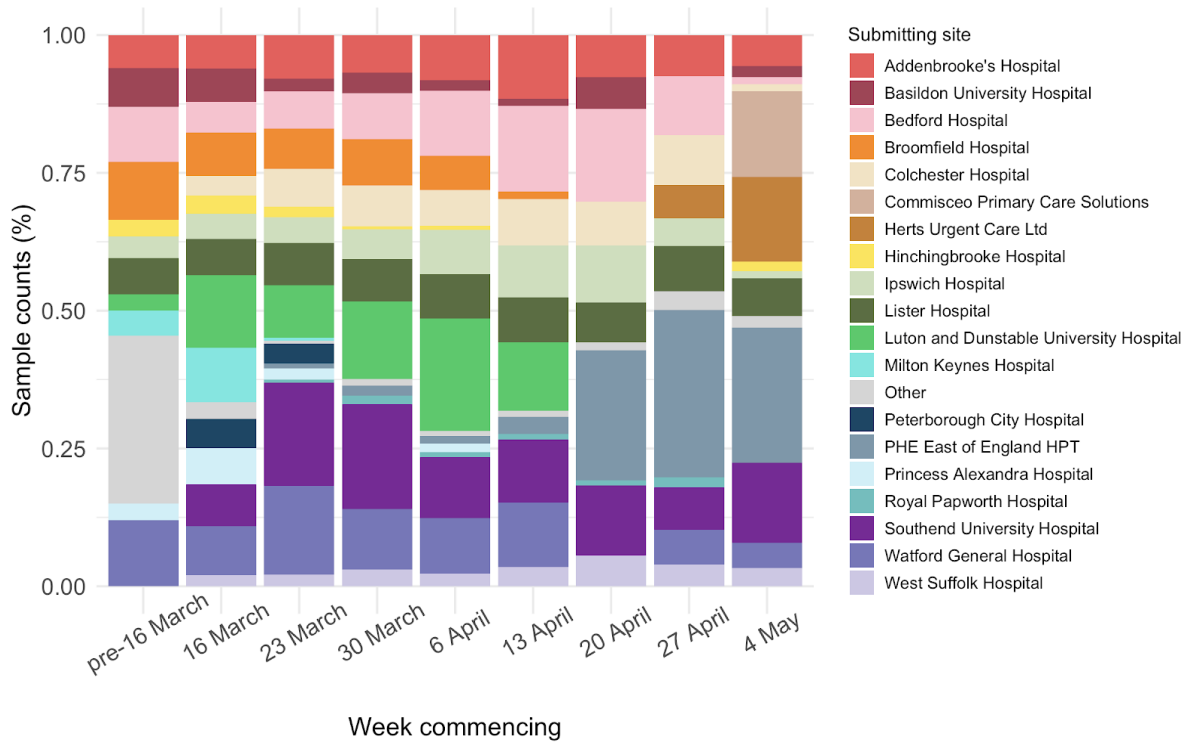

Only showing sites that submitted samples from >50 people with positive test results over study period, otherwise counted as “Other”. To maintain patient anonymity, per time interval only showing sites that submitted samples from >5 people with positive test results (otherwise counted as “Other”). Data prior to 16 March is amalgamated here due to low sample numbers. Note that over the course of the study, some sites changed testing provider from CMPHL as further testing sites became available around the region. This explains some of the variation in the relative proportion of cases submitted from each site. The numbers reported here do not necessarily reflect total case numbers for each hospital or submitting organisation, as tests may have been performed elsewhere or metadata not collected in this study; the numbers are included purely to indicate where the samples included in this study originated from.

1 **Care home locations by county, showing nursing and residential homes**

2

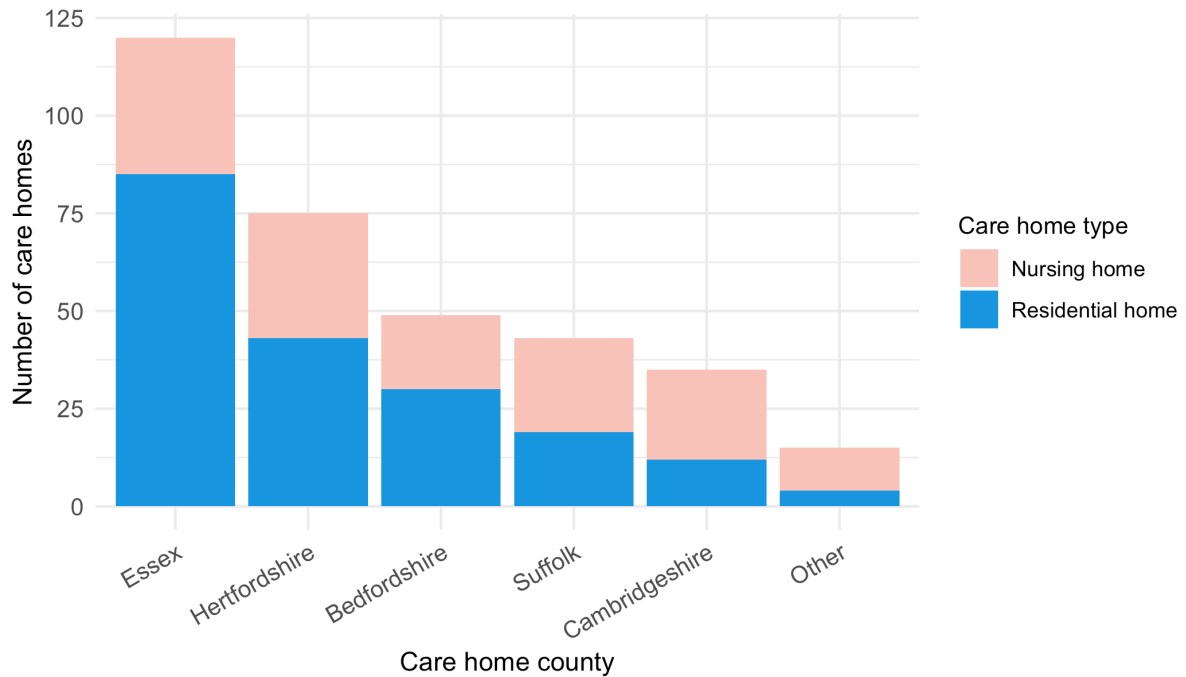

3

4

5 Only showing the five counties with the largest number of cases (all >25) to preserve patient  
6 anonymity. Definitions of “nursing home” and “residential home” are based on Care Quality  
7 Commission (CQC) information on whether nursing care is or is not present. If no nursing care is  
8 available the home is classified as a residential home. If the same care home offers both nursing and  
9 residential care then the home is classified as a nursing home (see Supplementary Methods for further  
10 details).

11

12

# 1 Distribution of cases per care home for nursing and residential homes

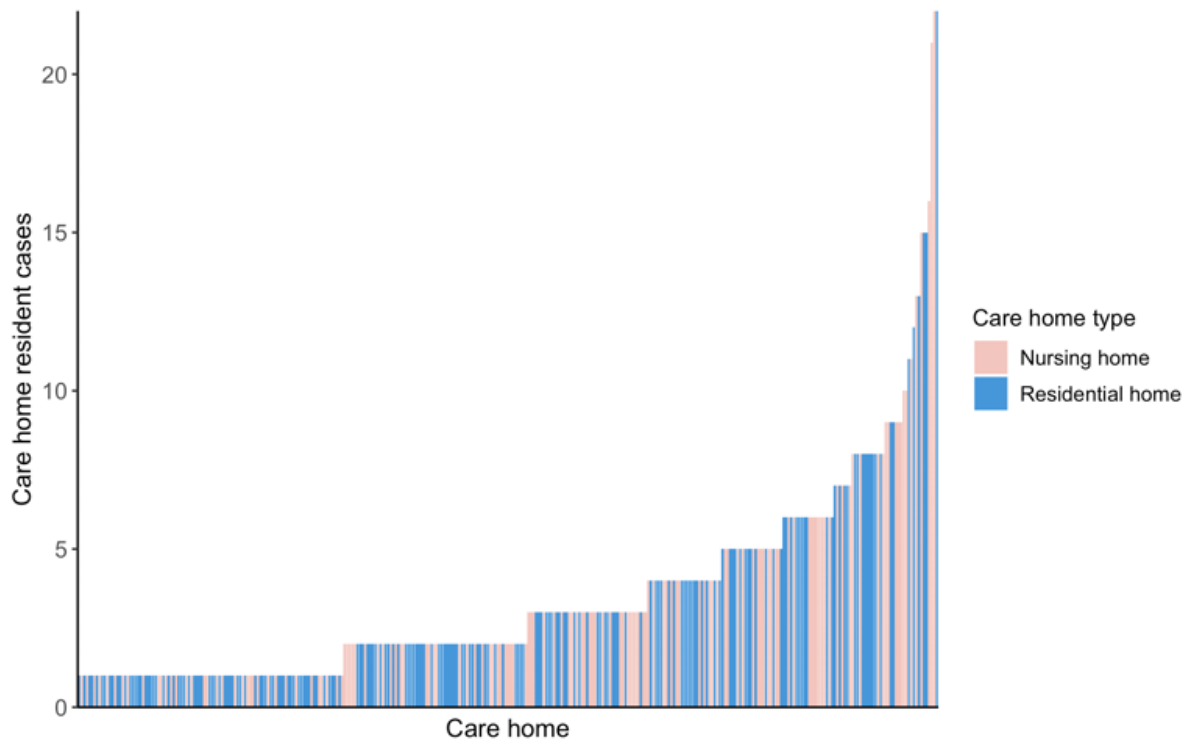

2

3 The number of positive cases per care home was highly skewed, such that a relatively small number  
4 of care homes contributed a large proportion of cases (right-hand side of the plot).

5

1 **Case numbers in residential and nursing homes**

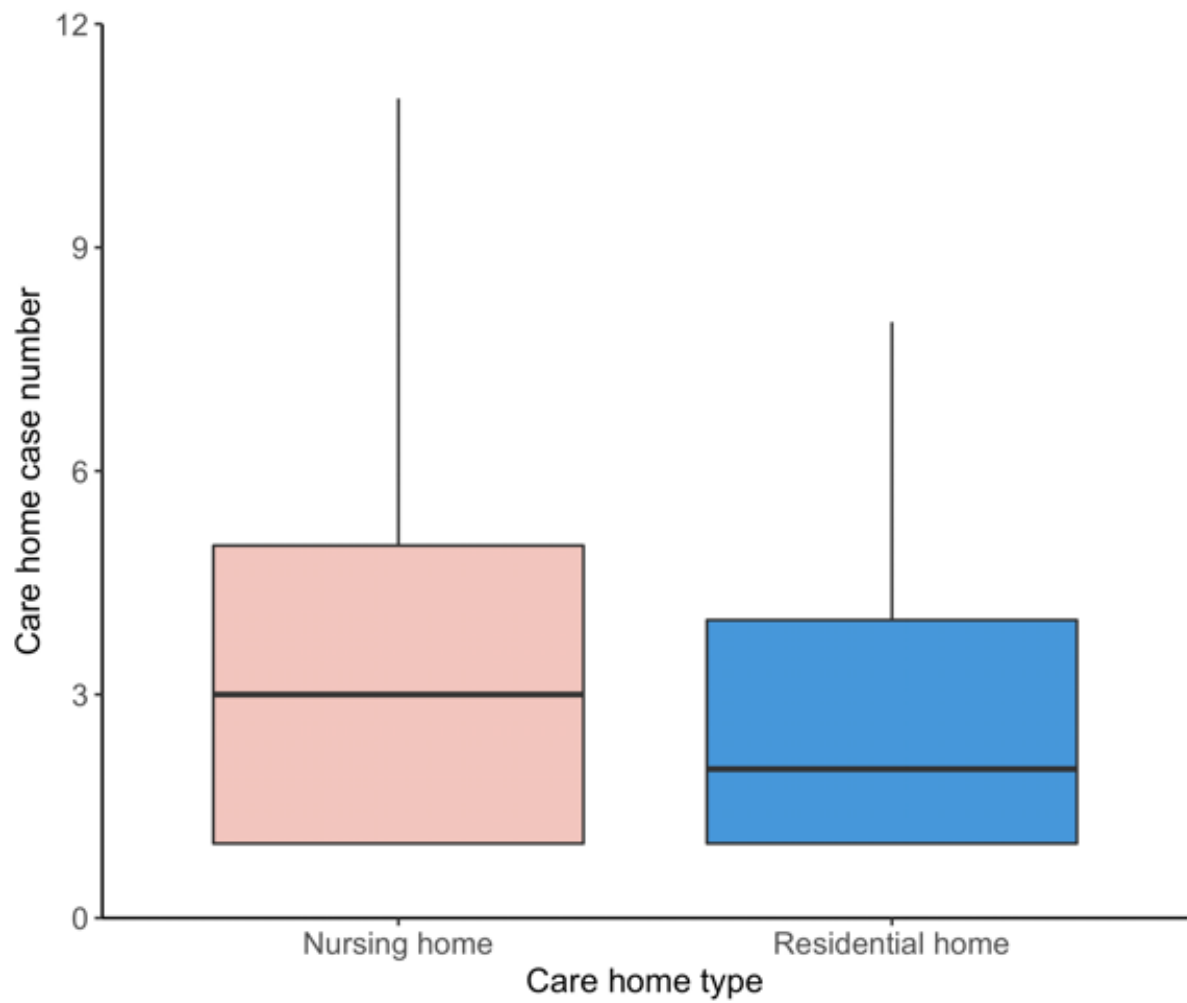

2  
3  
4  
5  
6  
7

Median cases per care home for nursing homes was 3 (IQR: 2-4), compared with 2 (IQR: 1-3) for residential homes ( $P=0.03$ , Wilcoxon rank sum test).

# 1 Positive cases per week per care home

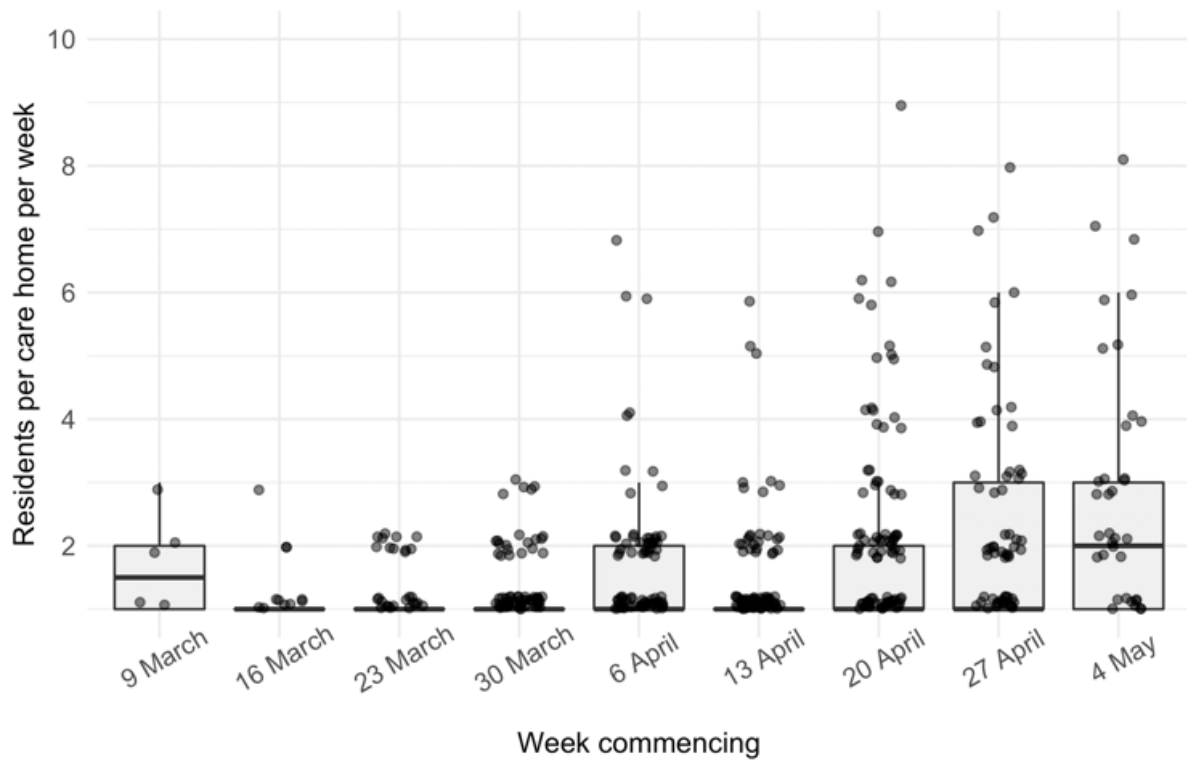

2  
3  
4  
5  
6  
7

Number of positive care home residents testing positive per care home per week over the study period. There was a slight trend for increasing positives per care home per week, though this may reflect increased testing rather than increased case burden within care homes.

## 1 Proportion of weekly positives from care home residents

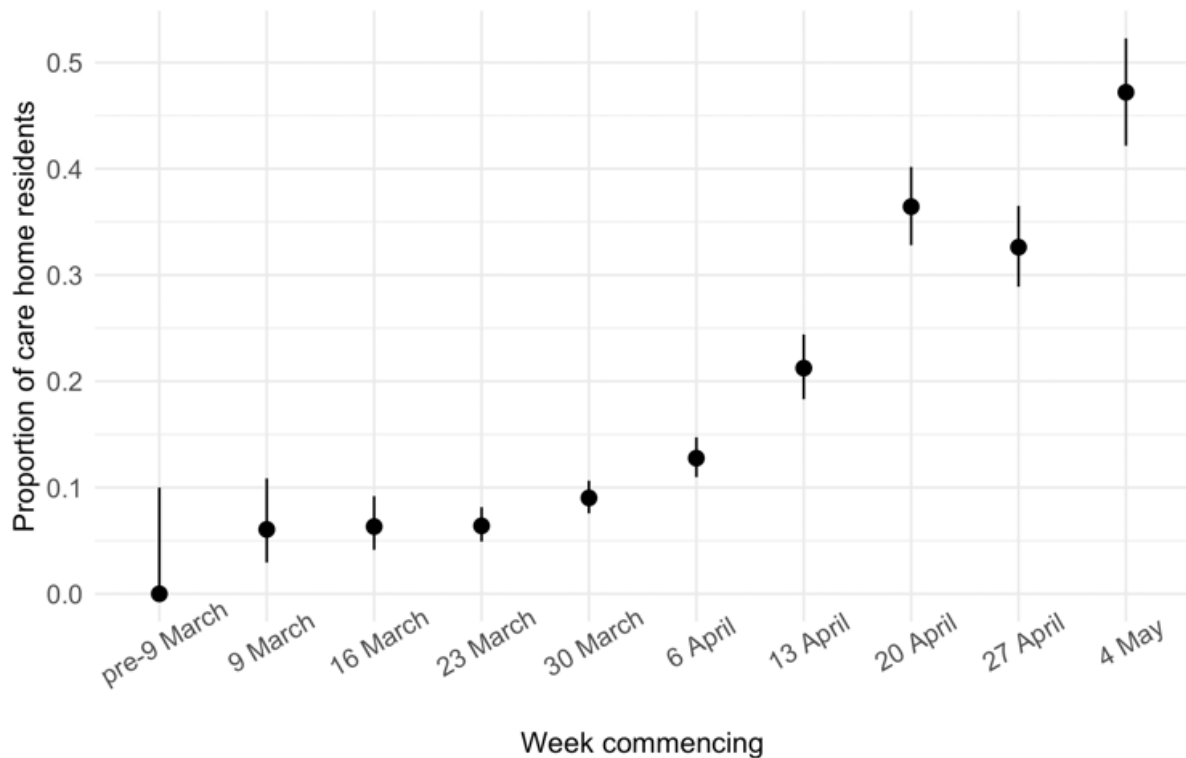

2  
3  
4  
5  
6  
7  
8  
9  
10  
11  
12  
13  
14  
15  
16  
17  
18  
19  
20

Proportion of positive tests from care home residents for each week over the study period. Weeks commencing 24 Feb (N=4) and 2 March (N=31) were amalgamated into “pre-9 March” (N=35) due to the low case numbers for these weeks. Bars show 95% exact binomial confidence intervals for each week’s proportion. Raw numbers are shown in Appendix p 25. Statistical significance was tested using a Chi squared test, taking the number of care home residents each week as the “observed” counts, and calculating “expected” counts by multiplying total positives for each week by the overall proportion of care home residents across the whole population (i.e. the null hypothesis expects every week to have the same proportion of care home residents, equal to the overall proportion). The difference was significant ( $P<0.0001$ ). Note that this trend may be influenced by the changing profile of sites submitting samples to the CMPHL; for example, if other hospitals in EoE tested more of their own samples later in the study period while community-based testing organisations still used CMPHL. However, we observed the same trend of an increasing proportion of cases coming from care homes over the study period for the patients tested acutely in Cambridge University Hospitals NHS Foundation Trust (CUH, Appendix p 26), which does not have variations in sample origins over the study period (all cases being from patients tested acutely at CUH).



1 **Case numbers from care homes and non-care home residents per week**

2

| <b>Week commencing</b> | <b>Care home resident</b> | <b>Not determined</b> | <b>Not care home resident</b> | <b>Weekly total</b> | <b>Care home resident (%)</b> |
|------------------------|---------------------------|-----------------------|-------------------------------|---------------------|-------------------------------|
| 24-Feb                 | 0                         | 0                     | ≤5                            | ≤5                  | 0.0%                          |
| 02-Mar                 | 0                         | 0                     | 31                            | 31                  | 0.0%                          |
| 09-Mar                 | 10                        | 6                     | 149                           | 165                 | 6.1%                          |
| 16-Mar                 | 25                        | 6                     | 364                           | 395                 | 6.3%                          |
| 23-Mar                 | 60                        | 26                    | 852                           | 938                 | 6.4%                          |
| 30-Mar                 | 126                       | 35                    | 1235                          | 1396                | 9.0%                          |
| 06-Apr                 | 162                       | 43                    | 1064                          | 1269                | 12.8%                         |
| 13-Apr                 | 154                       | 31                    | 540                           | 725                 | 21.2%                         |
| 20-Apr                 | 247                       | 16                    | 415                           | 678                 | 36.4%                         |
| 27-Apr                 | 198                       | 16                    | 393                           | 607                 | 32.6%                         |
| 04-May                 | 185                       | 8                     | 199                           | 392                 | 47.2%                         |

3

4 Data plotted in Figure 2A of main text, showing case numbers for care homes, non-care homes, and  
5 undetermined, for all EoE samples tested at CMPHL.

6

7

1 **Case numbers tested at CUH by infection type**

2

| Week   | CAI, care home-associated (%) | CAI, healthcare-associated | CAI, not care home | HAI definite | HAI indeterminate | HAI suspected | HCW | Other | Total |
|--------|-------------------------------|----------------------------|--------------------|--------------|-------------------|---------------|-----|-------|-------|
| 09-Mar | <b>0 (0%)</b>                 | 2                          | 9                  | 0            | 1                 | 0             | 0   | 0     | 12    |
| 16-Mar | <b>0 (0%)</b>                 | 3                          | 19                 | 0            | 1                 | 0             | 0   | 1     | 24    |
| 23-Mar | <b>1 (1.3%)</b>               | 6                          | 50                 | 11           | 1                 | 5             | 1   | 0     | 75    |
| 30-Mar | <b>5 (5.2%)</b>               | 9                          | 56                 | 9            | 3                 | 3             | 7   | 4     | 96    |
| 06-Apr | <b>14 (14.1%)</b>             | 14                         | 50                 | 10           | 1                 | 2             | 4   | 4     | 99    |
| 13-Apr | <b>14 (28.6%)</b>             | 2                          | 18                 | 6            | 2                 | 2             | 0   | 5     | 49    |
| 20-Apr | <b>10 (24.4%)</b>             | 8                          | 15                 | 2            | 2                 | 0             | 3   | 1     | 41    |
| 27-Apr | <b>9 (22.0%)</b>              | 4                          | 22                 | 1            | 1                 | 1             | 0   | 3     | 41    |
| 04-May | <b>6 (22.2%)</b>              | 1                          | 17                 | 0            | 1                 | 0             | 0   | 2     | 27    |

3

4 Data plotted in Figure 2B of main text, showing case numbers for different categories of COVID-19  
5 infection tested acutely at Cambridge University Hospitals NHS Foundation Trust (CUH). CAI =  
6 Community Acquired Infection; HAI = Hospital Acquired Infection; HCW = Healthcare Worker. The  
7 small number of “Other” cases were inpatient transfers to CUH where infection origins could not be  
8 determined. Definitions of indeterminate, suspected and definite healthcare-associated hospital-  
9 onset infections follow from (Meredith et al., 2020); i.e. CAI = first positive <48 hours from admission,  
10 healthcare-associated if healthcare contact within 14 days; HAI indeterminate = first positive 48 hours  
11 to 7 days post admission; HAI suspected = first positive 8-14 days post admission; HAI definite = first  
12 positive >14 days post admission. As with (Meredith et al., 2020), these data only include HCW tested  
13 acutely in CUH medical services, not cases detected through the CUH healthcare worker screening  
14 programme.

15

# 1 Care home residents per week showing genome sequencing site

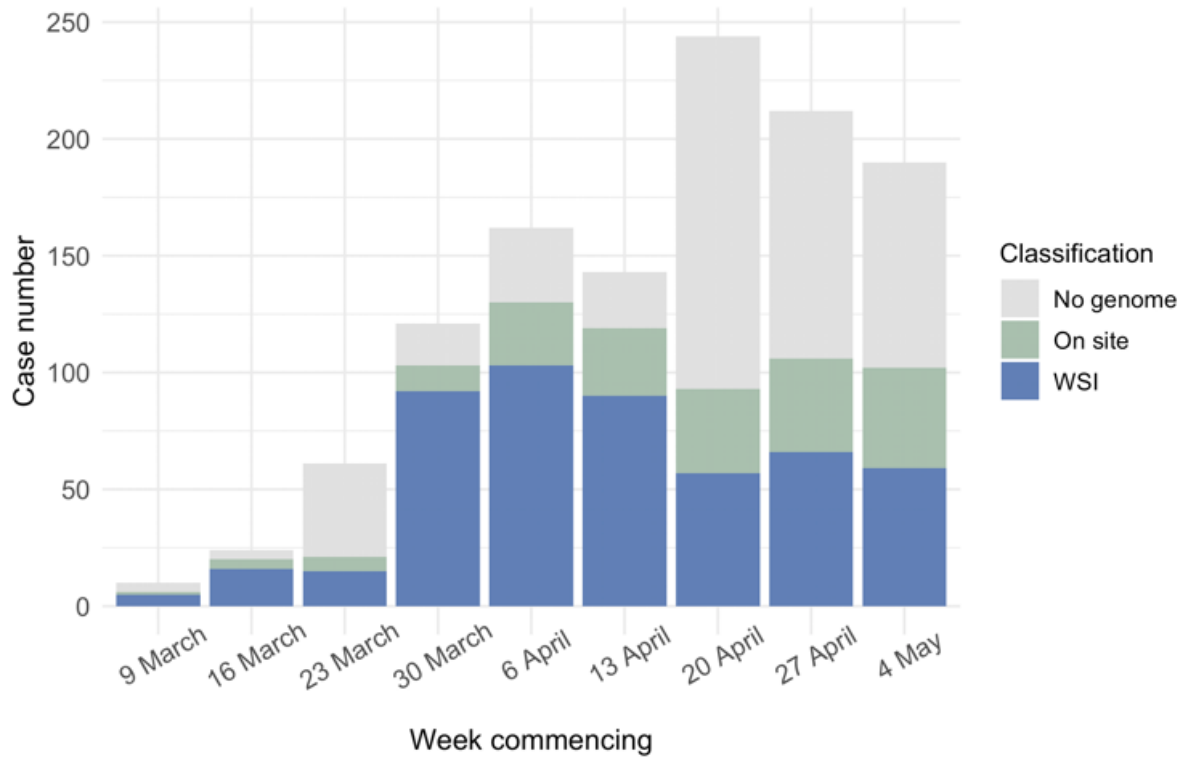

2

3 Plot shows total care home residents testing positive per week over the study period, showing number  
4 of care home residents with genomes included in the study broken down by sequencing location (on  
5 site in the Department of Pathology, Division of Virology or at the Wellcome Sanger Institute).

6

7

1 **Distribution of pairwise SNP differences between care home samples**

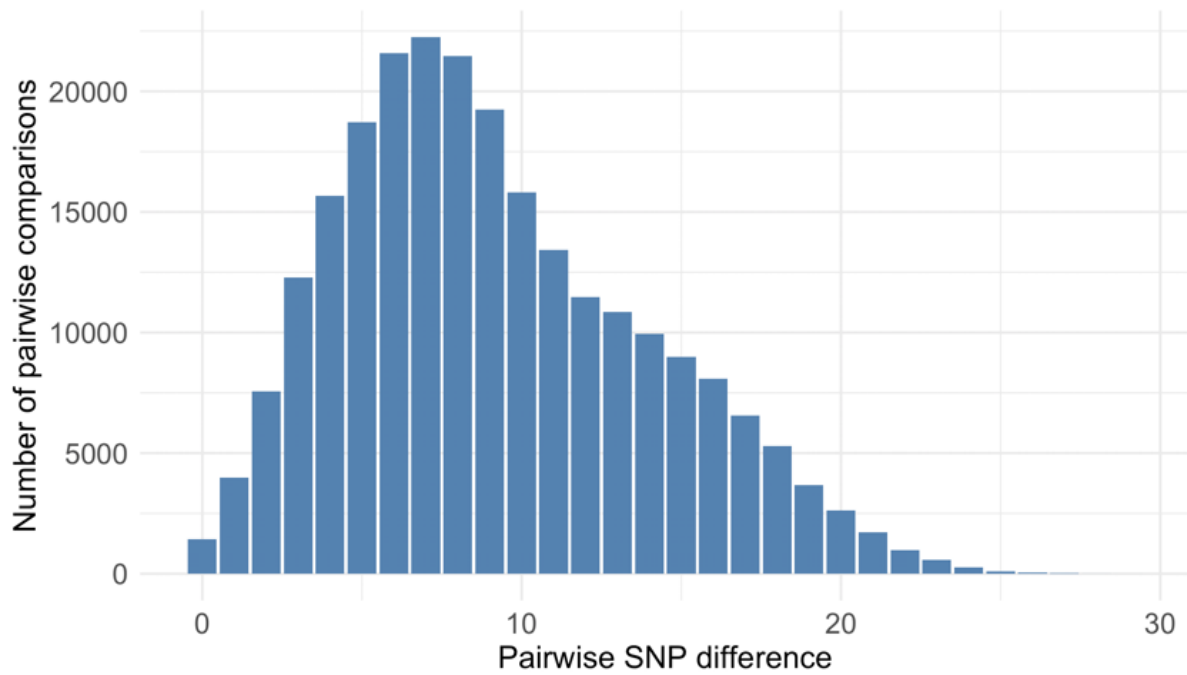

2  
3  
4  
5  
6

Pairwise SNP differences between the 700 care home residents (244,650 comparisons). Median pairwise SNP difference was 8.

1 **Viral lineage composition in care home patients by week**

2 **A. Counts**

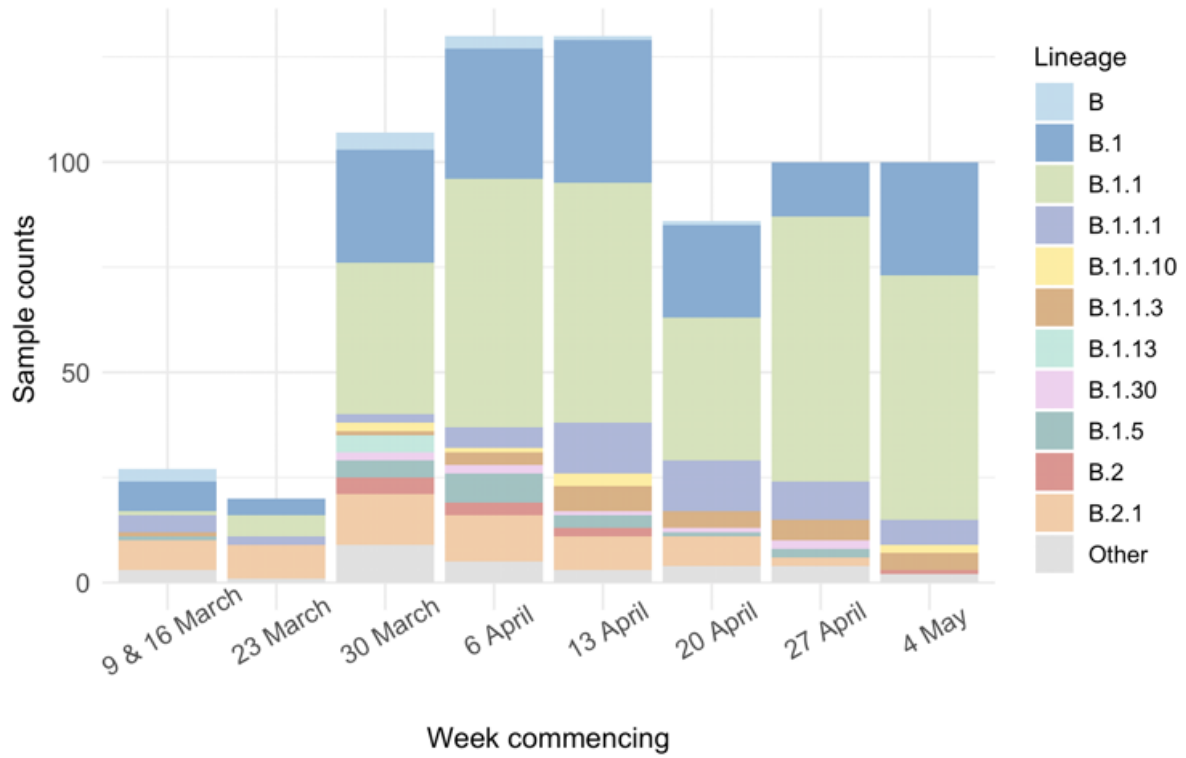

3

4 **B. Ratios**

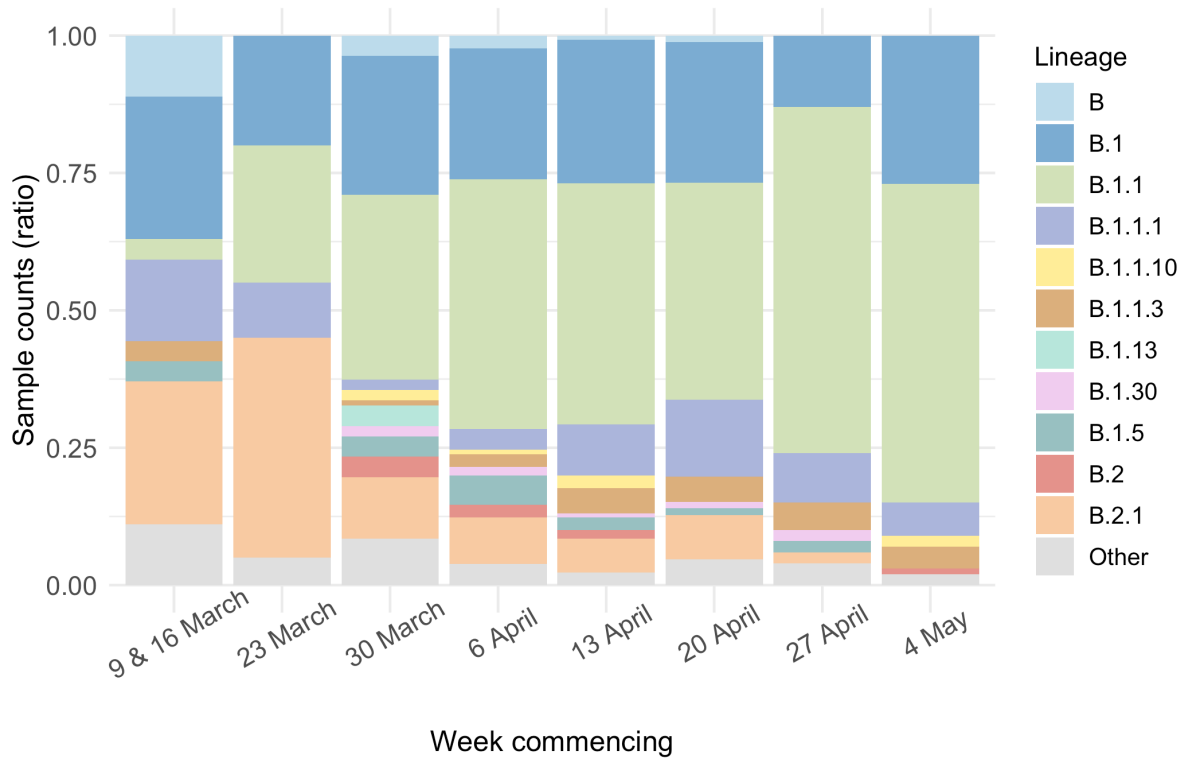

5

6

1 **Viral lineage composition in sub-sample of non care home patients by week**

2 **C. Counts**

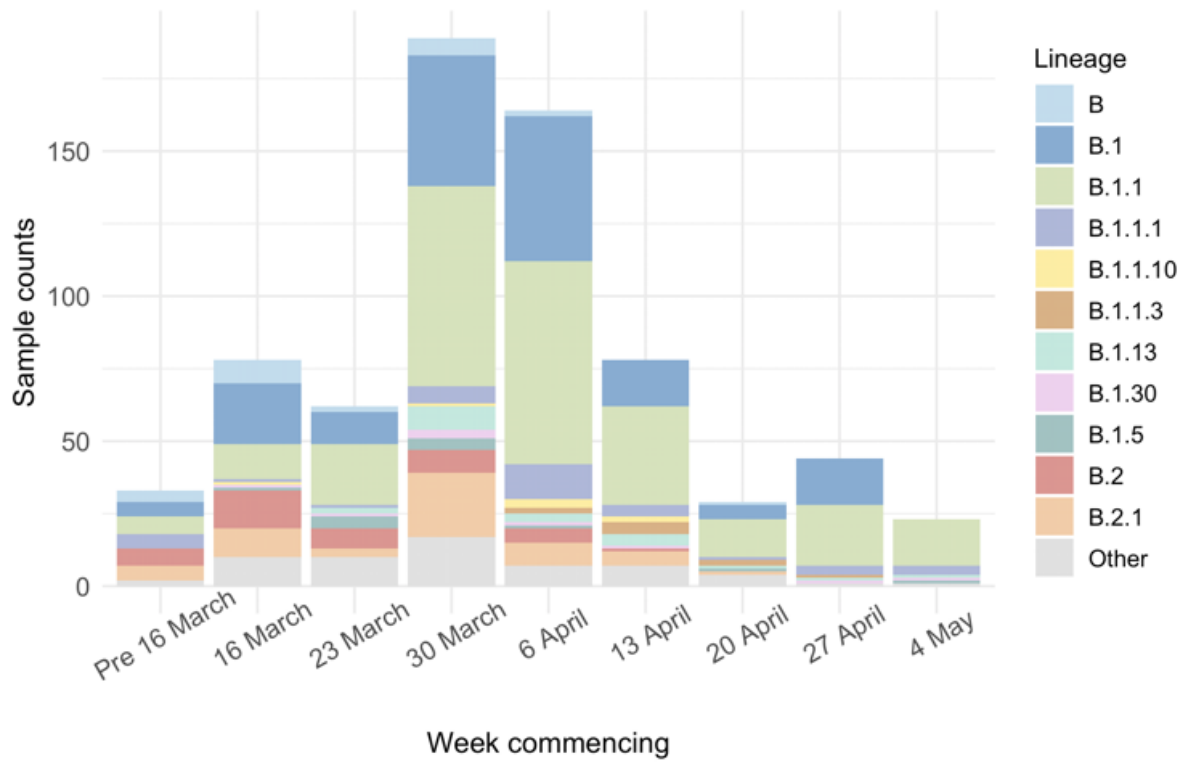

3

4 **D. Ratios**

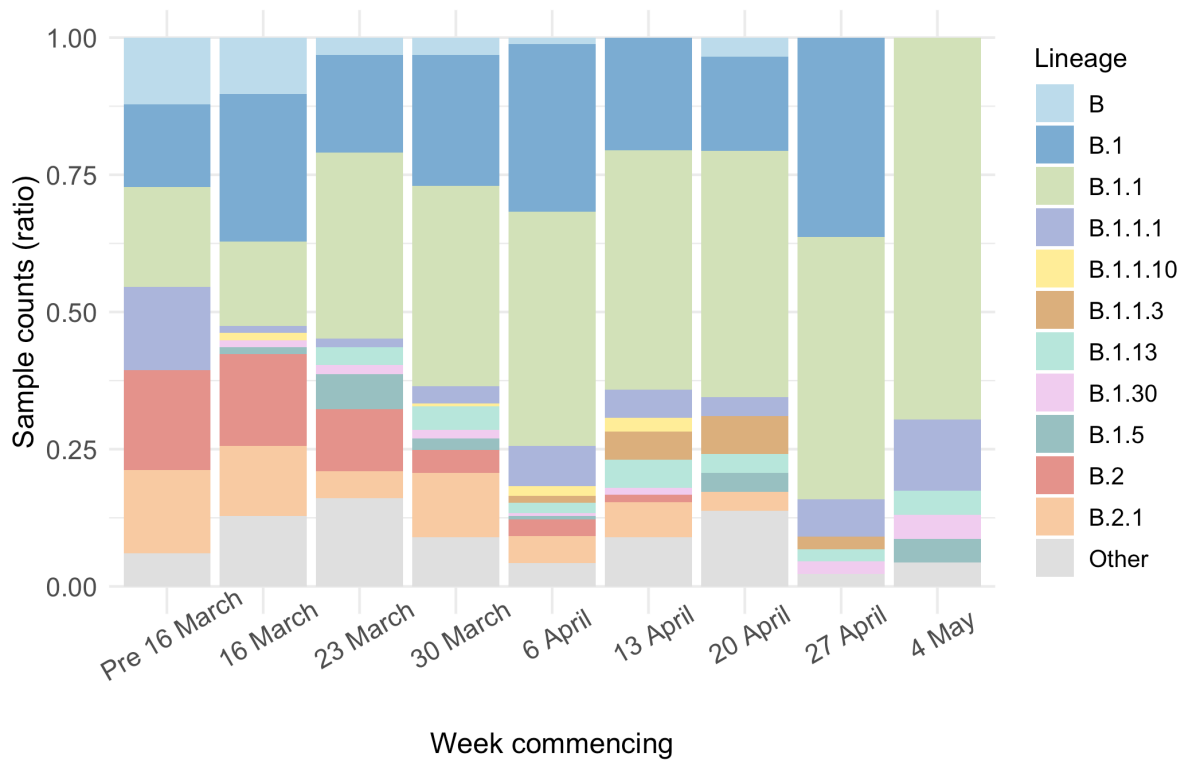

5

6

1 **Histogram of pairwise transmission probabilities between care home**  
2 **samples**

3

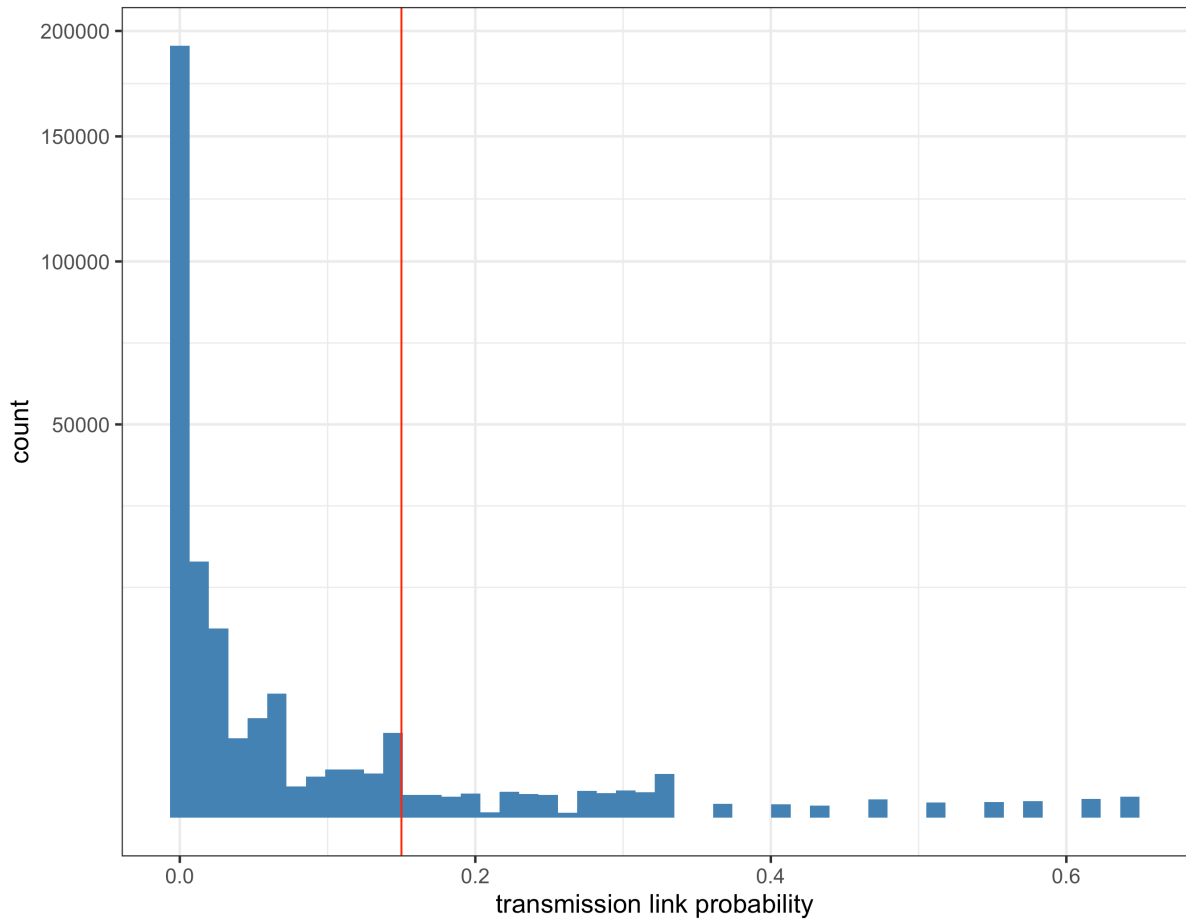

4

5

6 Histogram of the pairwise probabilities for cases being connected by  $\leq 2$  intermediate hosts for all 700  
7 care home residents as inferred by the *transcluster* algorithm, with vertical red line at 0.15 showing  
8 the cutoff used to identify care home clusters in our analysis. Note the data gaps along the x-axis  
9 reflect the inherent discontinuity of the input datasets, measured in days and SNP differences  
10 between cases.

11

# 1 Transmission probability threshold vs number of care home clusters

2

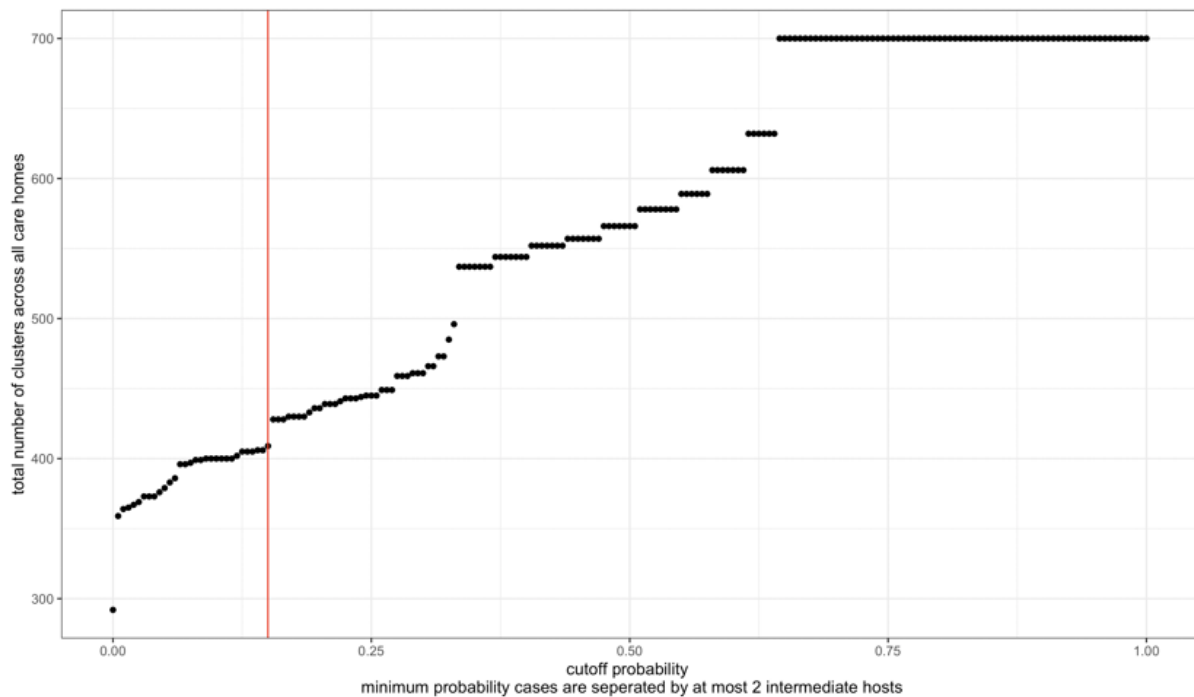

3

4

5 The *transcluster* algorithm computes the likelihood of two samples being linked within a given number  
6 of intermediate hosts, based on the date and genetic differences between samples (assuming a given  
7 serial interval and mutation rate, further details in Supplementary Methods). Changing the probability  
8 threshold used to define clusters changes the number of clusters defined, with a higher threshold  
9 yielding more clusters (and higher likelihood of transmission within each cluster). Our sample set  
10 contained 700 genomes from residents in 292 care homes, and we treated each care home separately  
11 as microcosms of potential infection networks. Therefore, the highest theoretical number of clusters  
12 is 700, if every genome were its own cluster; and the lowest possible number of clusters is 292, if every  
13 person within each care home was part of the same cluster. The cutoff we used ( $\geq 15\%$  probability of  
14 transmission with  $\leq 2$  intermediate hosts) is indicated by the red vertical line. This is arbitrary, and was  
15 selected 1) because the distribution of pairwise SNP and date differences within resulting clusters  
16 appeared reasonable (Appendix pp 33-34) and because of a “jump” in the number of clusters occurring  
17 at that point.

18

19

20



1 **Pairwise SNP difference distribution within clusters**

2

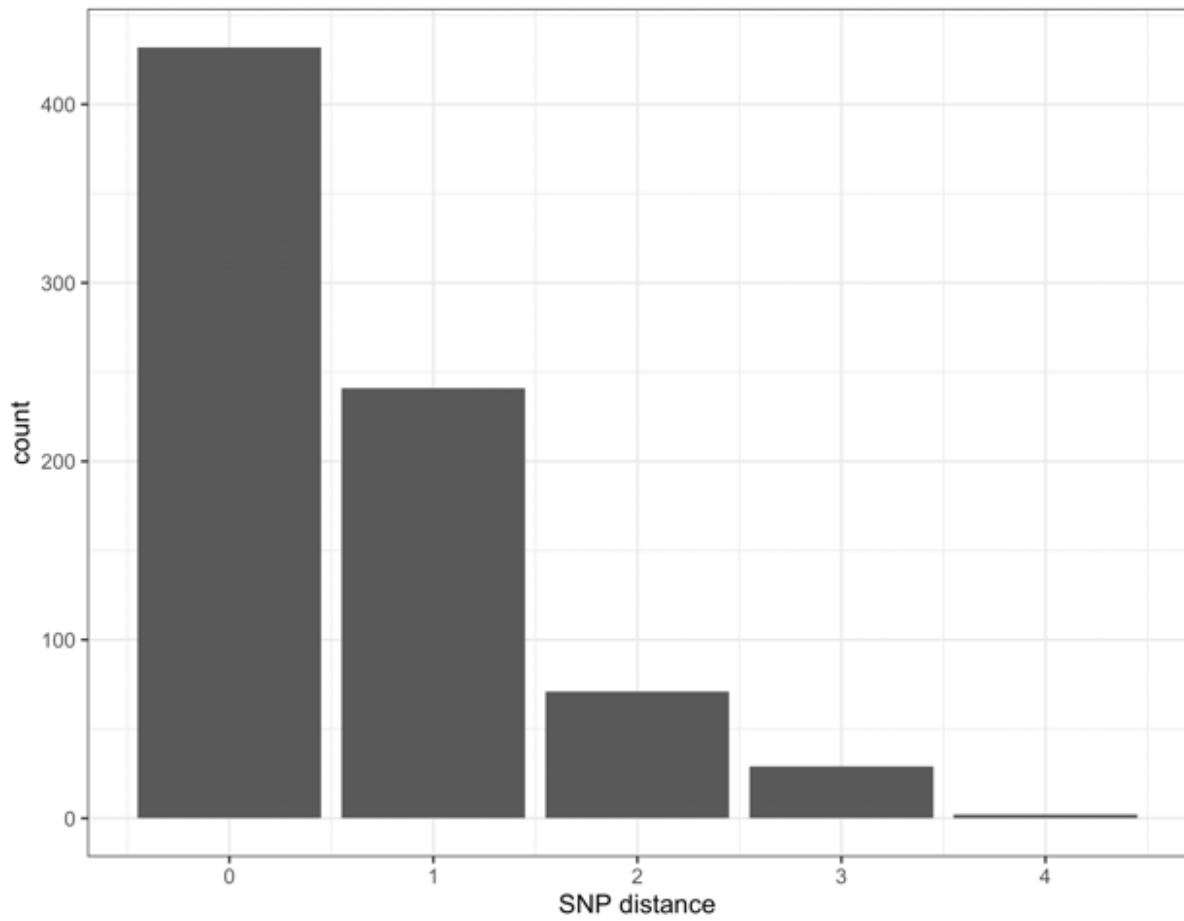

3

4 Most genomes within the clusters defined using our model parameters were separated by zero or 1

5 SNPs, with a small number having higher SNP differences

6

7

1 **Pairwise date difference distribution within clusters**

2

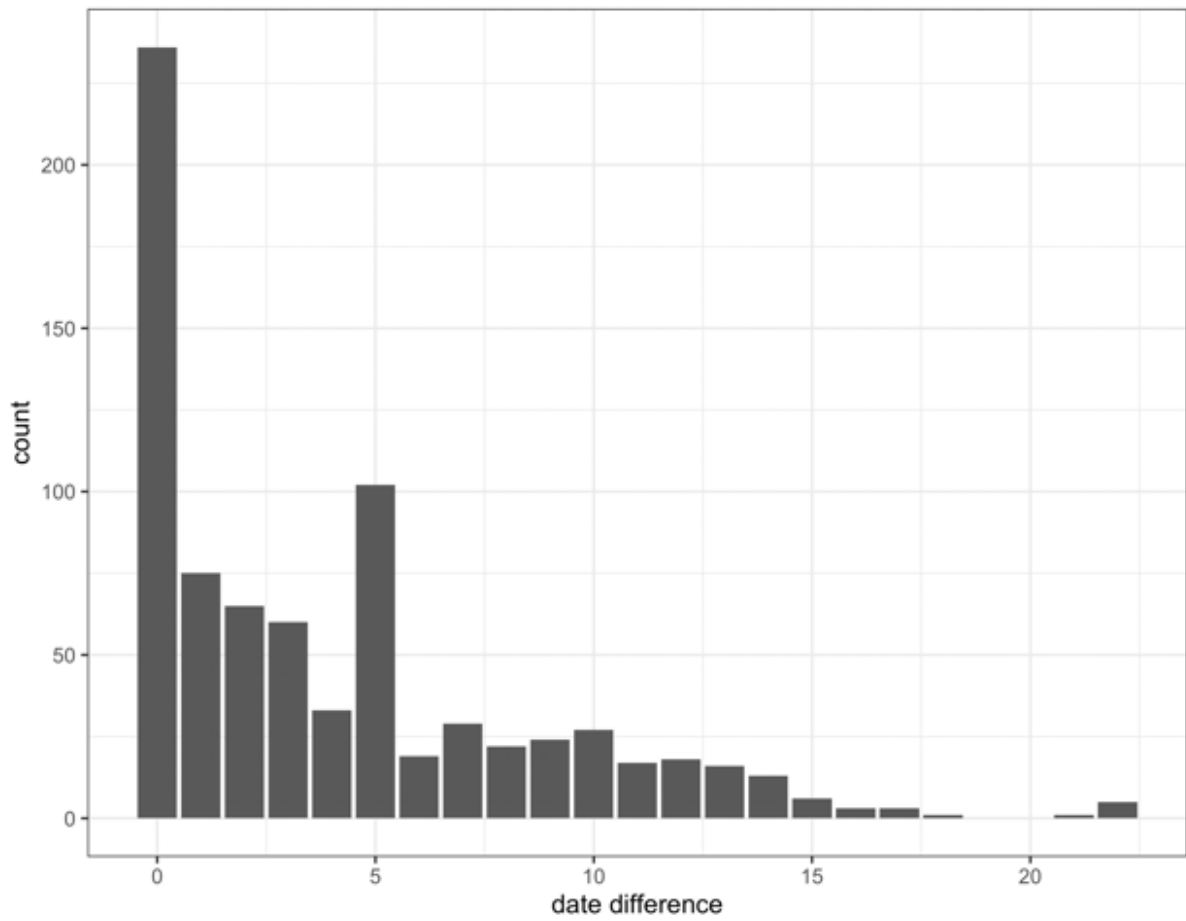

3

4 Most samples within the clusters defined using our model parameters were separated by <14 days,  
5 with a small number separated by longer durations.

6

7

8

1 **Transmission links identified between two nearby care homes and several**  
2 **healthcare workers**

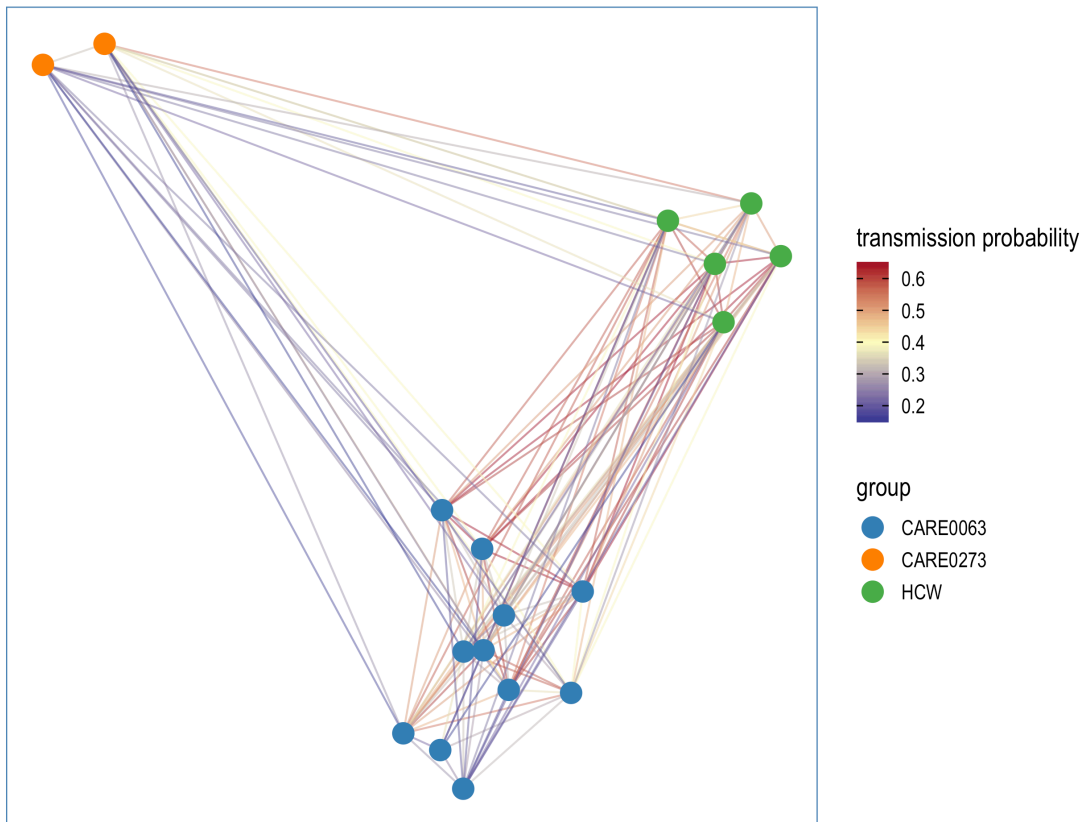

3

4 Two care homes, CARE0063 (blue) and CARE0273 (orange), each had strong transmission links  
5 identified with the *transcluster* algorithm to a group of healthcare workers (HCW, green). The HCW  
6 comprised paramedics and care home carers – one working at CARE0063 and the other working at an  
7 unknown care home. We do not have confirmatory epidemiological data available, but this raises the  
8 possibility of the cases sharing a linked transmission network.

## 1 Cambridge COG-UK IDs for all samples analysed in this study

2 The main analysis set comprised 700 genomes from care home residents. Additionally, a  
3 randomised selection of 700 genomes from non-care home residents was used for  
4 comparisons (selection methods described in Appendix pp 8-9), and genomes from 76  
5 healthcare workers (HCW) tested at CUH were included for the analysis of care home  
6 resident-HCW transmission in CUH patients. The genomes are accessible through the COG-  
7 UK website data section (<https://www.cogconsortium.uk/data/>) and via the MRC-CLIMB  
8 (<https://www.climb.ac.uk/>), with COG-UK codes shown below.

9

|            |            |            |            |            |
|------------|------------|------------|------------|------------|
| CAMB-84B12 | CAMB-784CB | CAMB-71CBB | CAMB-7A04D | CAMB-7B70B |
| CAMB-84E19 | CAMB-784E9 | CAMB-770C8 | CAMB-7A001 | CAMB-7BA5D |
| CAMB-84E73 | CAMB-78504 | CAMB-71C42 | CAMB-7A0F2 | CAMB-7BAC6 |
| CAMB-84FBC | CAMB-74517 | CAMB-776D5 | CAMB-7A07A | CAMB-7B9BA |
| CAMB-84F9E | CAMB-7474E | CAMB-7767B | CAMB-7A03E | CAMB-785AA |
| CAMB-751A9 | CAMB-74720 | CAMB-777E1 | CAMB-79FD8 | CAMB-7BBE1 |
| CAMB-75437 | CAMB-7218E | CAMB-77277 | CAMB-7A292 | CAMB-7BBC3 |
| CAMB-7566E | CAMB-72045 | CAMB-777A5 | CAMB-7A14A | CAMB-7BBA5 |
| CAMB-74C21 | CAMB-71E6A | CAMB-77954 | CAMB-7A4BA | CAMB-7BB87 |
| CAMB-74CA9 | CAMB-75ADB | CAMB-778DF | CAMB-7A5A8 | CAMB-7BC57 |
| CAMB-74F91 | CAMB-75A71 | CAMB-777F0 | CAMB-7A7C0 | CAMB-7BBB4 |
| CAMB-740F8 | CAMB-75F27 | CAMB-773A1 | CAMB-7A836 | CAMB-7BCDF |
| CAMB-73F47 | CAMB-75D69 | CAMB-77383 | CAMB-7A7FD | CAMB-7BF30 |
| CAMB-73FB0 | CAMB-737B8 | CAMB-7705F | CAMB-7A793 | CAMB-78391 |
| CAMB-741AA | CAMB-76454 | CAMB-77286 | CAMB-7A9AC | CAMB-7BF6D |
| CAMB-7427A | CAMB-761D5 | CAMB-770E6 | CAMB-7A98E | CAMB-7BEAC |
| CAMB-74104 | CAMB-764CD | CAMB-77A9D | CAMB-78E72 | CAMB-7C47C |
| CAMB-744A1 | CAMB-762A5 | CAMB-77A51 | CAMB-78CA5 | CAMB-7C412 |
| CAMB-733A5 | CAMB-76C4D | CAMB-73D10 | CAMB-78D93 | CAMB-7C46D |
| CAMB-7333C | CAMB-767C4 | CAMB-7717A | CAMB-78B02 | CAMB-7C403 |
| CAMB-73211 | CAMB-76B9B | CAMB-770F5 | CAMB-791A5 | CAMB-7C6EF |
| CAMB-731F6 | CAMB-76B31 | CAMB-7720E | CAMB-7912D | CAMB-7C685 |
| CAMB-7317E | CAMB-76AF8 | CAMB-7809A | CAMB-790E4 | CAMB-7C588 |
| CAMB-73114 | CAMB-73A82 | CAMB-79873 | CAMB-793DC | CAMB-7C791 |
| CAMB-730AE | CAMB-76894 | CAMB-79785 | CAMB-79318 | CAMB-7C861 |
| CAMB-72F93 | CAMB-7681C | CAMB-79767 | CAMB-796F1 | CAMB-7C7A0 |
| CAMB-72D7B | CAMB-76AE9 | CAMB-79907 | CAMB-7970D | CAMB-78276 |
| CAMB-72B44 | CAMB-76C7A | CAMB-79B89 | CAMB-7B7FC | CAMB-7C8DA |
| CAMB-72A56 | CAMB-77796 | CAMB-73BDA | CAMB-7B6FF | CAMB-7CB0E |
| CAMB-727C8 | CAMB-76DFF | CAMB-79E80 | CAMB-7B7ED | CAMB-7CBD1 |

|            |            |            |            |            |
|------------|------------|------------|------------|------------|
| CAMB-7CCA1 | CAMB-7EB66 | CAMB-805EB | CAMB-818E1 | CAMB-826C8 |
| CAMB-7CC29 | CAMB-7EE7C | CAMB-7AFAA | CAMB-818A5 | CAMB-82974 |
| CAMB-78786 | CAMB-7F066 | CAMB-80527 | CAMB-81AEB | CAMB-7C38E |
| CAMB-7849E | CAMB-7F048 | CAMB-80ABF | CAMB-81ACD | CAMB-7C3AC |
| CAMB-7CDF9 | CAMB-7AD46 | CAMB-8077C | CAMB-81A81 | CAMB-82859 |
| CAMB-7CD80 | CAMB-7AD55 | CAMB-80958 | CAMB-819A2 | CAMB-82DC3 |
| CAMB-7CCED | CAMB-7E8E7 | CAMB-808F1 | CAMB-81B9D | CAMB-7C263 |
| CAMB-7CEAB | CAMB-7E86F | CAMB-7B0C4 | CAMB-81C8B | CAMB-8306F |
| CAMB-7859B | CAMB-7F0B1 | CAMB-8082E | CAMB-81C6D | CAMB-830F6 |
| CAMB-7CFF3 | CAMB-7EFD3 | CAMB-80800 | CAMB-81C21 | CAMB-830BA |
| CAMB-7D29F | CAMB-7AD91 | CAMB-80DF2 | CAMB-81C03 | CAMB-7C2AF |
| CAMB-7D305 | CAMB-7F312 | CAMB-80CF5 | CAMB-81B42 | CAMB-832A5 |
| CAMB-7D39C | CAMB-7AC76 | CAMB-80CD7 | CAMB-7B422 | CAMB-7C218 |
| CAMB-7D350 | CAMB-7F2BB | CAMB-80E0E | CAMB-7B413 | CAMB-8322D |
| CAMB-7D53C | CAMB-7F29D | CAMB-80DE3 | CAMB-7B440 | CAMB-831A8 |
| CAMB-78865 | CAMB-7ADBF | CAMB-80DA7 | CAMB-81DC4 | CAMB-8331B |
| CAMB-7D851 | CAMB-7F233 | CAMB-80C40 | CAMB-7BFD6 | CAMB-833EE |
| CAMB-7D754 | CAMB-7F1FA | CAMB-7B0D3 | CAMB-82358 | CAMB-83366 |
| CAMB-7D860 | CAMB-7F34F | CAMB-80B16 | CAMB-8225B | CAMB-7E243 |
| CAMB-7D763 | CAMB-7F2E8 | CAMB-812B6 | CAMB-7C00F | CAMB-80FB0 |
| CAMB-7DA00 | CAMB-7F37C | CAMB-81298 | CAMB-824DD | CAMB-834FA |
| CAMB-7D9C7 | CAMB-7F400 | CAMB-81368 | CAMB-824BF | CAMB-7E207 |
| CAMB-7DA97 | CAMB-7F558 | CAMB-8132C | CAMB-82491 | CAMB-8358E |
| CAMB-7DC73 | CAMB-7AC3A | CAMB-8130E | CAMB-82437 | CAMB-83560 |
| CAMB-7DB49 | CAMB-7F716 | CAMB-812C5 | CAMB-82419 | CAMB-7E146 |
| CAMB-78A50 | CAMB-7AE52 | CAMB-8124D | CAMB-7C166 | CAMB-837B5 |
| CAMB-7DE9B | CAMB-7F85F | CAMB-813A4 | CAMB-824A0 | CAMB-83797 |
| CAMB-7DE04 | CAMB-7FA59 | CAMB-815CC | CAMB-7C139 | CAMB-7E1DD |
| CAMB-7ABA6 | CAMB-7F95C | CAMB-81580 | CAMB-8267D | CAMB-7E1BF |
| CAMB-789DB | CAMB-7FA68 | CAMB-81526 | CAMB-825F8 | CAMB-80F38 |
| CAMB-7AB79 | CAMB-7AEAD | CAMB-8175D | CAMB-8268C | CAMB-83B13 |
| CAMB-7E0FE | CAMB-7AF40 | CAMB-8173F | CAMB-82640 | CAMB-83ADA |
| CAMB-7E9E4 | CAMB-8018D | CAMB-816F6 | CAMB-8281D | CAMB-7E155 |
| CAMB-78953 | CAMB-80123 | CAMB-7B307 | CAMB-826F5 | CAMB-83A52 |
| CAMB-7E96C | CAMB-80466 | CAMB-7B316 | CAMB-826B9 | CAMB-83BC8 |
| CAMB-7AAF4 | CAMB-805DC | CAMB-7B334 | CAMB-7C3CA | CAMB-83B6E |
| CAMB-7EB75 | CAMB-80590 | CAMB-816E7 | CAMB-7C306 | CAMB-7E137 |
| CAMB-7AB00 | CAMB-80536 | CAMB-81975 | CAMB-827A7 | CAMB-83AAD |
| CAMB-7EAF0 | CAMB-80518 | CAMB-8181E | CAMB-82789 | CAMB-83C3E |
| CAMB-7EBC0 | CAMB-80642 | CAMB-81966 | CAMB-826E6 | CAMB-83C10 |

|             |             |             |             |             |
|-------------|-------------|-------------|-------------|-------------|
| CAMB-83BD7  | CAMB-1AA92A | CAMB-8217C  | CAMB-83D77  | CAMB-1AE05E |
| CAMB-83CC5  | CAMB-1AA8E1 | CAMB-821C7  | CAMB-83463  | CAMB-1AE030 |
| CAMB-83CA7  | CAMB-1AAA90 | CAMB-1ABB41 | CAMB-83481  | CAMB-1AE0E5 |
| CAMB-83BE6  | CAMB-1AAA54 | CAMB-1ABAAE | CAMB-83DA4  | CAMB-1AE0C7 |
| CAMB-84277  | CAMB-1AAA36 | CAMB-1ABA26 | CAMB-83DB3  | CAMB-1ABEDF |
| CAMB-84329  | CAMB-1AAB24 | CAMB-1AB9ED | CAMB-82BAB  | CAMB-1AE06D |
| CAMB-842C2  | CAMB-1AAB06 | CAMB-81FCE  | CAMB-83E29  | CAMB-1AE04F |
| CAMB-8424A  | CAMB-1AACF4 | CAMB-1AB895 | CAMB-83F53  | CAMB-1ABFBE |
| CAMB-8422C  | CAMB-1AABD9 | CAMB-8214F  | CAMB-83F44  | CAMB-1AE373 |
| CAMB-80F29  | CAMB-1AABE8 | CAMB-81F64  | CAMB-83E1A  | CAMB-1ABF72 |
| CAMB-841E3  | CAMB-1AABAC | CAMB-1AB428 | CAMB-83FBD  | CAMB-1AC0F6 |
| CAMB-841C5  | CAMB-1AAE1C | CAMB-1AB40A | CAMB-1ADE55 | CAMB-1AE382 |
| CAMB-84435  | CAMB-7FE3F  | CAMB-1ABD78 | CAMB-83F35  | CAMB-1AE6B6 |
| CAMB-84356  | CAMB-1AAD79 | CAMB-1ABD5A | CAMB-1ADD1C | CAMB-1AC1D5 |
| CAMB-80EE0  | CAMB-1AAE0D | CAMB-1ABCD5 | CAMB-1ADE28 | CAMB-1AC1F3 |
| CAMB-7E322  | CAMB-1AB23D | CAMB-81FFB  | CAMB-84040  | CAMB-1AE698 |
| CAMB-8458D  | CAMB-1AB21F | CAMB-1ABE2A | CAMB-1ADD67 | CAMB-1ACFDB |
| CAMB-8456F  | CAMB-81122  | CAMB-829A1  | CAMB-840D7  | CAMB-1AE67A |
| CAMB-7E304  | CAMB-1AB1F4 | CAMB-1ABD87 | CAMB-1ADFCB | CAMB-1AE65C |
| CAMB-1AA359 | CAMB-1AB19A | CAMB-1ABD69 | CAMB-8406E  | CAMB-1AE63E |
| CAMB-80EB3  | CAMB-1AB112 | CAMB-82015  | CAMB-1ADF34 | CAMB-1AE610 |
| CAMB-1AA3E0 | CAMB-1AB1A9 | CAMB-1AB6B9 | CAMB-1ADF16 | CAMB-1AC25A |
| CAMB-1AA368 | CAMB-1AB18B | CAMB-82947  | CAMB-840AA  | CAMB-1AC296 |
| CAMB-1AA30E | CAMB-81061  | CAMB-1AB69B | CAMB-1ADEDD | CAMB-1AC2B4 |
| CAMB-1AA4DE | CAMB-1AB2B5 | CAMB-1AB65F | CAMB-1AE003 | CAMB-1AC2D2 |
| CAMB-80E95  | CAMB-1AB3C1 | CAMB-1AB631 | CAMB-1AB6E6 | CAMB-1AD0B9 |
| CAMB-1AA69C | CAMB-1ABC5D | CAMB-1AB5DA | CAMB-1AB7C5 | CAMB-1AD17A |
| CAMB-1AA614 | CAMB-1ABC3F | CAMB-1AB5BC | CAMB-1AB7E3 | CAMB-1AD13E |
| CAMB-1AA5BD | CAMB-1ABBF6 | CAMB-1AB59E | CAMB-1ADF61 | CAMB-1AD12F |
| CAMB-1AA66F | CAMB-8117D  | CAMB-1AB552 | CAMB-1AE2D0 | CAMB-1AE71D |
| CAMB-1AA623 | CAMB-1ABCC6 | CAMB-1AB6C8 | CAMB-1AE2B2 | CAMB-1AE847 |
| CAMB-1AA5EA | CAMB-1ABC6C | CAMB-1AB6AA | CAMB-1AE294 | CAMB-1AE7C2 |
| CAMB-1AA83C | CAMB-8109E  | CAMB-1AB66E | CAMB-1AE1F1 | CAMB-1AD0E6 |
| CAMB-7F88C  | CAMB-1ABBAB | CAMB-1AB640 | CAMB-1AE1D3 | CAMB-1AE72C |
| CAMB-80E86  | CAMB-1ABB6F | CAMB-82B32  | CAMB-1AE1B5 | CAMB-1AE9BD |
| CAMB-1AA7C6 | CAMB-1ABB32 | CAMB-82B50  | CAMB-1AE197 | CAMB-1AD2C2 |
| CAMB-7FD23  | CAMB-821A9  | CAMB-83D0E  | CAMB-1AE13D | CAMB-1AE8B0 |
| CAMB-80E59  | CAMB-1AB4FB | CAMB-82A80  | CAMB-1ABEC0 | CAMB-1AF03F |
| CAMB-7FD05  | CAMB-1AB4DD | CAMB-829FC  | CAMB-1ABEA2 | CAMB-1AD004 |
| CAMB-1AA948 | CAMB-1AB491 | CAMB-82CA8  | CAMB-1AE07C | CAMB-1AF08A |

1

2

|             |             |             |             |            |
|-------------|-------------|-------------|-------------|------------|
| CAMB-1AD268 | CAMB-1AD981 | CAMB-1B1182 | CAMB-1B1823 | CAMB-84AF7 |
| CAMB-1AEFCA | CAMB-1AFC4A | CAMB-1B12F8 | CAMB-1B1C90 | CAMB-84AD9 |
| CAMB-1AF1F0 | CAMB-1AFC2C | CAMB-1AFF9C | CAMB-1B17EA | CAMB-84B6D |
| CAMB-1AF1B4 | CAMB-1AFBC5 | CAMB-1B145C | CAMB-1B188D | CAMB-84B8B |
| CAMB-1AF15A | CAMB-1AFB2F | CAMB-1B143E | CAMB-1B17CC | CAMB-84C1F |
| CAMB-1AD893 | CAMB-1AEBC6 | CAMB-1AFFBA | CAMB-1AF56D | CAMB-84C3D |
| CAMB-1AD70F | CAMB-1AFB98 | CAMB-1B1410 | CAMB-1B06A2 | CAMB-84D76 |
| CAMB-1AD796 | CAMB-1AFB7A | CAMB-1AFFE7 | CAMB-1B0709 | CAMB-84E37 |
| CAMB-1AD6B7 | CAMB-1AFB10 | CAMB-1B142F | CAMB-1B0745 | CAMB-84EBF |
| CAMB-1AF891 | CAMB-1AFDA1 | CAMB-1B13C8 | CAMB-1B0718 | CAMB-84F70 |
| CAMB-1AF961 | CAMB-1AFD47 | CAMB-1B13AA | CAMB-1B0727 | CAMB-75622 |
| CAMB-1AF925 | CAMB-1AFD0B | CAMB-1B1313 | CAMB-1B0763 | CAMB-75516 |
| CAMB-1ADAD9 | CAMB-1AFCE0 | CAMB-1B151D | CAMB-1B1BC0 | CAMB-7537E |
| CAMB-1AF846 | CAMB-1AFDFC | CAMB-1B1489 | CAMB-1AED75 | CAMB-753B2 |
| CAMB-1AF679 | CAMB-1AFDDE | CAMB-1B011A | CAMB-1B1C45 | CAMB-754FB |
| CAMB-1AF65B | CAMB-1AFDB0 | CAMB-1B144D | CAMB-1B1C27 | CAMB-7525B |
| CAMB-1AF63D | CAMB-1AFD92 | CAMB-1B1586 | CAMB-1B0754 | CAMB-7524C |
| CAMB-1AF61F | CAMB-1ADBC7 | CAMB-1B14D4 | CAMB-1B1E6D | CAMB-75525 |
| CAMB-1B047B | CAMB-1B087F | CAMB-1AF5E5 | CAMB-1B1DCA | CAMB-75455 |
| CAMB-1B0411 | CAMB-1B08E8 | CAMB-1B1568 | CAMB-1AED93 | CAMB-74FBF |
| CAMB-1B03D8 | CAMB-1ADBB8 | CAMB-1B15E0 | CAMB-1AEDA2 | CAMB-754DD |
| CAMB-1B048A | CAMB-1AEBE4 | CAMB-1B15C2 | CAMB-1B1DAC | CAMB-74FDD |
| CAMB-1ADB21 | CAMB-1B1119 | CAMB-1AF66A | CAMB-1AED84 | CAMB-754B7 |
| CAMB-1AEBB7 | CAMB-1B1049 | CAMB-1B004A | CAMB-1B1E21 | CAMB-7565F |
| CAMB-1B03C9 | CAMB-1B102B | CAMB-1B1717 | CAMB-1B1E03 | CAMB-75367 |
| CAMB-1ADB12 | CAMB-1AEC1E | CAMB-1B002C | CAMB-1B1DE8 | CAMB-750CA |
| CAMB-1B02F9 | CAMB-1B1146 | CAMB-1B07BE | CAMB-1B1D8E | CAMB-7517C |
| CAMB-1B02DB | CAMB-1B10EF | CAMB-1B07FA | CAMB-1AEF15 | CAMB-75130 |
| CAMB-1ADAF7 | CAMB-1B10C1 | CAMB-1B0824 | CAMB-1B0183 | CAMB-75491 |
| CAMB-1B0235 | CAMB-1AECD2 | CAMB-1B1629 | CAMB-1B228E | CAMB-75200 |
| CAMB-1B0217 | CAMB-1B11BF | CAMB-1B0648 | CAMB-8473C  | CAMB-755BC |
| CAMB-1B01DE | CAMB-1B01A1 | CAMB-1B0666 | CAMB-84778  | CAMB-74C12 |
| CAMB-1B0341 | CAMB-1AED0C | CAMB-1AF55E | CAMB-84875  | CAMB-7522E |
| CAMB-1B02CC | CAMB-1B001D | CAMB-1B1814 | CAMB-84945  | CAMB-74F37 |
| CAMB-1AD80C | CAMB-1B1261 | CAMB-1AEF24 | CAMB-84954  | CAMB-7567D |
| CAMB-1AFB01 | CAMB-1B1155 | CAMB-1B0693 | CAMB-849CD  | CAMB-75024 |
| CAMB-1AFAE6 | CAMB-1B1304 | CAMB-1B1841 | CAMB-84A06  | CAMB-74BF7 |
| CAMB-1AD963 | CAMB-1AFFC9 | CAMB-1AED57 | CAMB-846E4  | CAMB-74F82 |
| CAMB-1AFA7D | CAMB-1B1164 | CAMB-1B18E7 | CAMB-84AAC  | CAMB-74CF4 |
| CAMB-1AD972 | CAMB-1B12E9 | CAMB-1AED39 | CAMB-84BB8  | CAMB-74B24 |

|            |            |            |            |            |
|------------|------------|------------|------------|------------|
| CAMB-75121 | CAMB-7323F | CAMB-79A40 | CAMB-76472 | CAMB-71AEE |
| CAMB-74A09 | CAMB-731D8 | CAMB-79A04 | CAMB-762D2 | CAMB-77022 |
| CAMB-74BAC | CAMB-731C9 | CAMB-79AF5 | CAMB-760F6 | CAMB-73800 |
| CAMB-74B33 | CAMB-731AB | CAMB-7233D | CAMB-765CA | CAMB-75929 |
| CAMB-74B60 | CAMB-7319C | CAMB-79AB9 | CAMB-7658E | CAMB-75956 |
| CAMB-74D2E | CAMB-73071 | CAMB-79A9B | CAMB-76481 | CAMB-759A1 |
| CAMB-74D6A | CAMB-73053 | CAMB-74571 | CAMB-76445 | CAMB-77514 |
| CAMB-74B42 | CAMB-73017 | CAMB-74526 | CAMB-763EE | CAMB-774F9 |
| CAMB-749A2 | CAMB-73008 | CAMB-74508 | CAMB-763A2 | CAMB-7749F |
| CAMB-74E85 | CAMB-72FEE | CAMB-7473F | CAMB-762E1 | CAMB-77471 |
| CAMB-74E58 | CAMB-72FOC | CAMB-74711 | CAMB-76032 | CAMB-76FEA |
| CAMB-74D3D | CAMB-72EB4 | CAMB-72160 | CAMB-73994 | CAMB-77392 |
| CAMB-740CB | CAMB-72EA5 | CAMB-72072 | CAMB-76D0E | CAMB-76FCC |
| CAMB-751E5 | CAMB-72E96 | CAMB-72063 | CAMB-76B40 | CAMB-76FAE |
| CAMB-758A4 | CAMB-72D11 | CAMB-72054 | CAMB-769EC | CAMB-77374 |
| CAMB-73FA1 | CAMB-72C9C | CAMB-72018 | CAMB-769A0 | CAMB-737D6 |
| CAMB-74395 | CAMB-72C6F | CAMB-71FB2 | CAMB-768C1 | CAMB-7731A |
| CAMB-74C5E | CAMB-72C41 | CAMB-71F67 | CAMB-7680D | CAMB-772D1 |
| CAMB-74016 | CAMB-72C23 | CAMB-71F49 | CAMB-766E5 | CAMB-77990 |
| CAMB-73F29 | CAMB-72C14 | CAMB-7469C | CAMB-76C10 | CAMB-772B3 |
| CAMB-74377 | CAMB-72BEA | CAMB-7468D | CAMB-76BF5 | CAMB-7774B |
| CAMB-7419B | CAMB-72BAE | CAMB-71E88 | CAMB-76ABC | CAMB-7768A |
| CAMB-7424D | CAMB-72B62 | CAMB-75CF3 | CAMB-76973 | CAMB-7766C |
| CAMB-74465 | CAMB-72AB0 | CAMB-75B9C | CAMB-768B2 | CAMB-759CF |
| CAMB-74140 | CAMB-72A1A | CAMB-75B7E | CAMB-76C6B | CAMB-778B1 |
| CAMB-73712 | CAMB-729A4 | CAMB-759FC | CAMB-76991 | CAMB-77893 |
| CAMB-736AC | CAMB-72986 | CAMB-75C8A | CAMB-76DD1 | CAMB-7756F |
| CAMB-735DC | CAMB-7292C | CAMB-75C6C | CAMB-71D30 | CAMB-737C7 |
| CAMB-735CD | CAMB-728B6 | CAMB-75BAB | CAMB-7614E | CAMB-774AE |
| CAMB-735AF | CAMB-72889 | CAMB-75B41 | CAMB-76102 | CAMB-773CF |
| CAMB-73581 | CAMB-7282F | CAMB-75F36 | CAMB-73A64 | CAMB-77365 |
| CAMB-74614 | CAMB-72740 | CAMB-75DD2 | CAMB-71C9D | CAMB-772A4 |
| CAMB-73527 | CAMB-7269E | CAMB-75D96 | CAMB-71C8E | CAMB-73D98 |
| CAMB-734EE | CAMB-725EC | CAMB-75D1E | CAMB-71C60 | CAMB-76F35 |
| CAMB-74623 | CAMB-72591 | CAMB-76005 | CAMB-71B54 | CAMB-77ABB |
| CAMB-73E1D | CAMB-72546 | CAMB-75F81 | CAMB-739B2 | CAMB-77A33 |
| CAMB-73E77 | CAMB-724FE | CAMB-75D4B | CAMB-77040 | CAMB-77AAC |
| CAMB-73E86 | CAMB-72476 | CAMB-75D2D | CAMB-71B18 | CAMB-73D2F |
| CAMB-733D2 | CAMB-72458 | CAMB-76612 | CAMB-71B09 | CAMB-771B6 |
| CAMB-7327B | CAMB-7243A | CAMB-765BB | CAMB-71AFD | CAMB-77198 |



|            |            |            |            |            |
|------------|------------|------------|------------|------------|
| CAMB-7804F | CAMB-7A739 | CAMB-78337 | CAMB-7CF99 | CAMB-7DF01 |
| CAMB-76E65 | CAMB-7A9E8 | CAMB-781E2 | CAMB-7CF3F | CAMB-7DFF2 |
| CAMB-76E47 | CAMB-7A9CA | CAMB-7BD54 | CAMB-7D00E | CAMB-78A32 |
| CAMB-7812E | CAMB-7A99D | CAMB-7BE42 | CAMB-7D059 | CAMB-7DD61 |
| CAMB-78012 | CAMB-73B16 | CAMB-7BDEB | CAMB-7D077 | CAMB-7E0C1 |
| CAMB-77D2B | CAMB-77B9A | CAMB-7862F | CAMB-78944 | CAMB-78971 |
| CAMB-77DB2 | CAMB-78D48 | CAMB-7C53D | CAMB-7D226 | CAMB-7E049 |
| CAMB-79855 | CAMB-78DB1 | CAMB-7C4F4 | CAMB-78883 | CAMB-7EA87 |
| CAMB-79864 | CAMB-78D75 | CAMB-7C4D6 | CAMB-7D1CF | CAMB-7EA4B |
| CAMB-7980A | CAMB-78D39 | CAMB-7C4B8 | CAMB-7D1A1 | CAMB-78917 |
| CAMB-797C1 | CAMB-78B99 | CAMB-7C61C | CAMB-78A14 | CAMB-7E98A |
| CAMB-798CE | CAMB-78B3F | CAMB-7C6C1 | CAMB-7D420 | CAMB-7EC18 |
| CAMB-79C59 | CAMB-78B11 | CAMB-7C649 | CAMB-7D323 | CAMB-7EB39 |
| CAMB-79C1D | CAMB-78FD9 | CAMB-786A7 | CAMB-7D3F6 | CAMB-7EAE1 |
| CAMB-79BD4 | CAMB-7913C | CAMB-7C5E2 | CAMB-7D37E | CAMB-7ECDC |
| CAMB-79C0E | CAMB-79336 | CAMB-7C5C4 | CAMB-7D2F9 | CAMB-7EC90 |
| CAMB-79CE0 | CAMB-79415 | CAMB-7C737 | CAMB-7D54B | CAMB-7ED60 |
| CAMB-79D38 | CAMB-7B6A4 | CAMB-7C6FE | CAMB-7D4A8 | CAMB-787D1 |
| CAMB-79CB3 | CAMB-796B5 | CAMB-7C7CE | CAMB-7D718 | CAMB-7A8FA |
| CAMB-79F32 | CAMB-7B64A | CAMB-7C782 | CAMB-7D675 | CAMB-7EEC7 |
| CAMB-79E9F | CAMB-79679 | CAMB-7C746 | CAMB-78847 | CAMB-7AD37 |
| CAMB-7A12C | CAMB-795F4 | CAMB-7874A | CAMB-7D684 | CAMB-7EE5E |
| CAMB-7A0E3 | CAMB-7957C | CAMB-7C931 | CAMB-7D0FF | CAMB-7EE30 |
| CAMB-7A0C5 | CAMB-78364 | CAMB-7C8F8 | CAMB-7D89D | CAMB-7F0C0 |
| CAMB-7A098 | CAMB-78346 | CAMB-7C922 | CAMB-7D833 | CAMB-7F00C |
| CAMB-7A010 | CAMB-7B7CF | CAMB-7CA01 | CAMB-7D7BE | CAMB-7AAC7 |
| CAMB-79FF6 | CAMB-7B783 | CAMB-7CAF2 | CAMB-7D790 | CAMB-7AA7C |
| CAMB-7A21A | CAMB-7B747 | CAMB-7CB3B | CAMB-7D824 | CAMB-7AD28 |
| CAMB-7A159 | CAMB-7B6E0 | CAMB-7CC83 | CAMB-7D97C | CAMB-7AD64 |
| CAMB-7A405 | CAMB-7BB3C | CAMB-7CE23 | CAMB-7DB76 | CAMB-7E841 |
| CAMB-7A2FC | CAMB-7BB1E | CAMB-7ABE2 | CAMB-7DAD3 | CAMB-7EF88 |
| CAMB-7A55D | CAMB-7BA7B | CAMB-784DA | CAMB-7DA3D | CAMB-7F057 |
| CAMB-7A511 | CAMB-7BA6C | CAMB-7CD35 | CAMB-7DA6A | CAMB-7F01B |
| CAMB-7A4F6 | CAMB-7B9C9 | CAMB-7CD17 | CAMB-7DA4C | CAMB-7EFF1 |
| CAMB-7A5F3 | CAMB-78328 | CAMB-7CE41 | CAMB-7DCEC | CAMB-7ADA0 |
| CAMB-7A881 | CAMB-7B914 | CAMB-7CDAE | CAMB-7DCA0 | CAMB-7F27F |
| CAMB-73B9E | CAMB-7B8F9 | CAMB-7CD26 | CAMB-7DBEF | CAMB-7F28E |
| CAMB-7A890 | CAMB-7BCB1 | CAMB-7CFA8 | CAMB-7DBC1 | CAMB-7F4A6 |
| CAMB-7A7DF | CAMB-7BC1B | CAMB-789EA | CAMB-7DFA7 | CAMB-7ACA3 |
| CAMB-7A775 | CAMB-7830A | CAMB-7CEC9 | CAMB-7DF89 | CAMB-7F46A |

|            |            |            |             |             |
|------------|------------|------------|-------------|-------------|
| CAMB-7F619 | CAMB-81483 | CAMB-7C03C | CAMB-835CA  | CAMB-82121  |
| CAMB-7F576 | CAMB-81438 | CAMB-7C11B | CAMB-834CD  | CAMB-820AC  |
| CAMB-7F4F1 | CAMB-813FF | CAMB-7C069 | CAMB-8383A  | CAMB-81F46  |
| CAMB-7AB1F | CAMB-7B2A0 | CAMB-8226A | CAMB-83779  | CAMB-82103  |
| CAMB-7AC49 | CAMB-813E0 | CAMB-8224C | CAMB-83885  | CAMB-81FBF  |
| CAMB-7AE07 | CAMB-813C2 | CAMB-82455 | CAMB-836D6  | CAMB-81EC1  |
| CAMB-7AC0D | CAMB-81623 | CAMB-823D0 | CAMB-8369A  | CAMB-82B23  |
| CAMB-7ABF1 | CAMB-7B1B2 | CAMB-82507 | CAMB-83A34  | CAMB-82B6F  |
| CAMB-7F79E | CAMB-7B1EF | CAMB-82482 | CAMB-83991  | CAMB-82AAE  |
| CAMB-7AEDA | CAMB-7B2BF | CAMB-7C087 | CAMB-839CE  | CAMB-83CF2  |
| CAMB-7AF8C | CAMB-81799 | CAMB-82570 | CAMB-83C98  | CAMB-82A9F  |
| CAMB-80A37 | CAMB-7B2EC | CAMB-8266E | CAMB-842B3  | CAMB-83D59  |
| CAMB-809D0 | CAMB-81711 | CAMB-827D4 | CAMB-8423B  | CAMB-83D86  |
| CAMB-80994 | CAMB-817E4 | CAMB-8275C | CAMB-841F2  | CAMB-83D95  |
| CAMB-80976 | CAMB-817C6 | CAMB-7C333 | CAMB-84453  | CAMB-83DD1  |
| CAMB-7AA6D | CAMB-817A8 | CAMB-7C315 | CAMB-843FC  | CAMB-83FF9  |
| CAMB-806AC | CAMB-8178A | CAMB-828D1 | CAMB-843DE  | CAMB-83EED  |
| CAMB-7B06A | CAMB-8174E | CAMB-8283B | CAMB-843B0  | CAMB-83F17  |
| CAMB-80897 | CAMB-7B4C8 | CAMB-82F72 | CAMB-84365  | CAMB-84013  |
| CAMB-8090D | CAMB-8168D | CAMB-82E93 | CAMB-84611  | CAMB-84110  |
| CAMB-80DB6 | CAMB-81896 | CAMB-82FAF | CAMB-845C9  | CAMB-1ADFCB |
| CAMB-80CB9 | CAMB-8185A | CAMB-82EA2 | CAMB-845AB  | CAMB-8413E  |
| CAMB-80D89 | CAMB-81984 | CAMB-82DF0 | CAMB-844EA  | CAMB-8415C  |
| CAMB-80D01 | CAMB-81948 | CAMB-82DD2 | CAMB-1AA2D4 | CAMB-8463F  |
| CAMB-7B0F1 | CAMB-7B3E9 | CAMB-82D5A | CAMB-1AA2E3 | CAMB-8467B  |
| CAMB-7B10D | CAMB-8182D | CAMB-82DE1 | CAMB-1AA2C5 | CAMB-1ABF81 |
| CAMB-80BAD | CAMB-81AFA | CAMB-830AB | CAMB-80EC2  | CAMB-1ABF54 |
| CAMB-80B43 | CAMB-81AAF | CAMB-8313F | CAMB-7E2CB  | CAMB-1ABF27 |
| CAMB-80BDA | CAMB-819EE | CAMB-8307E | CAMB-7E2F8  | CAMB-1AE2FE |
| CAMB-80B9E | CAMB-81C30 | CAMB-83032 | CAMB-1AA438 | CAMB-1AE1A6 |
| CAMB-80B52 | CAMB-7B3DA | CAMB-832B4 | CAMB-81140  | CAMB-1AE0A9 |
| CAMB-80B34 | CAMB-81BAC | CAMB-83296 | CAMB-7FEE4  | CAMB-1AC050 |
| CAMB-80E2C | CAMB-81B60 | CAMB-832C3 | CAMB-81131  | CAMB-1AB76B |
| CAMB-811F5 | CAMB-81D3D | CAMB-831E4 | CAMB-7FE20  | CAMB-1ABF90 |
| CAMB-8131D | CAMB-7B55C | CAMB-7C209 | CAMB-8118C  | CAMB-1AC111 |
| CAMB-815F9 | CAMB-7C02D | CAMB-83418 | CAMB-81E58  | CAMB-1AE522 |
| CAMB-814CF | CAMB-81D6A | CAMB-833DF | CAMB-810AD  | CAMB-1AC06F |
| CAMB-814B0 | CAMB-7C10C | CAMB-83445 | CAMB-81FA0  | CAMB-1AC08D |
| CAMB-81492 | CAMB-8233A | CAMB-7C1EE | CAMB-82006  | CAMB-1AC199 |
| CAMB-81474 | CAMB-7BF5E | CAMB-8357F | CAMB-82060  | CAMB-1AE4CB |

|             |             |            |            |
|-------------|-------------|------------|------------|
| CAMB-1AE689 | CAMB-1B1243 | CAMB-79943 | CAMB-80FFC |
| CAMB-1AD0AA | CAMB-1B1331 | CAMB-7AD19 | CAMB-81007 |
| CAMB-1AE601 | CAMB-1B1559 | CAMB-7AE61 | CAMB-81016 |
| CAMB-1AC357 | CAMB-1AF64C | CAMB-7B079 | CAMB-81025 |
| CAMB-1AF07B | CAMB-1B0059 | CAMB-7B219 | CAMB-81043 |
| CAMB-1ACFEA | CAMB-1B150E | CAMB-7B2FB | CAMB-8222E |
| CAMB-1AF05D | CAMB-1B003B | CAMB-7C0A5 | -          |
| CAMB-1AD259 | CAMB-1B1780 | CAMB-7C0B4 | -          |
| CAMB-1AEF51 | CAMB-1B0639 | CAMB-7C0C3 | -          |
| CAMB-1AEF8E | CAMB-1B0AF1 | CAMB-7C0D2 | -          |
| CAMB-1AD040 | CAMB-1AA429 | CAMB-7C1A2 | -          |
| CAMB-1AF293 | CAMB-1AA447 | CAMB-7C37F | -          |
| CAMB-1AD6A8 | CAMB-1AA465 | CAMB-7E164 | -          |
| CAMB-1AD7B4 | CAMB-1AAD2E | CAMB-7FB29 | -          |
| CAMB-1AD7A5 | CAMB-1AAE49 | CAMB-7FB47 | -          |
| CAMB-1AF864 | CAMB-1AAE58 | CAMB-7FB56 | -          |
| CAMB-1AD82A | CAMB-1AAE67 | CAMB-7FB65 | -          |
| CAMB-1AD8DF | CAMB-1AAE94 | CAMB-7FB74 | -          |
| CAMB-1AD909 | CAMB-1AAEB2 | CAMB-7FB83 | -          |
| CAMB-1B0402 | CAMB-1AC005 | CAMB-7FB92 | -          |
| CAMB-1ADAE8 | CAMB-1AC014 | CAMB-7FBA1 | -          |
| CAMB-1AD936 | CAMB-1AC023 | CAMB-7FBB0 | -          |
| CAMB-1AD7E1 | CAMB-1AC041 | CAMB-7FBCF | -          |
| CAMB-1B0244 | CAMB-1AC3C0 | CAMB-7FBDE | -          |
| CAMB-1AFA5F | CAMB-1AD8B1 | CAMB-7FBED | -          |
| CAMB-1ADB30 | CAMB-1AE391 | CAMB-7FBFC | -          |
| CAMB-1AFB6B | CAMB-1AE3CE | CAMB-7FC08 | -          |
| CAMB-1AFD29 | CAMB-1AEB6C | CAMB-7FC17 | -          |
| CAMB-1ADB5E | CAMB-1B05D2 | CAMB-7FC26 | -          |
| CAMB-1AFE17 | CAMB-1B05F0 | CAMB-7FC35 | -          |
| CAMB-1ADBE5 | CAMB-739D0  | CAMB-7FC44 | -          |
| CAMB-1B099A | CAMB-73D01  | CAMB-7FC53 | -          |
| CAMB-1B0851 | CAMB-781A6  | CAMB-7FC62 | -          |
| CAMB-1B08AC | CAMB-78407  | CAMB-7FC80 | -          |
| CAMB-1B0077 | CAMB-784BC  | CAMB-7FC9F | -          |
| CAMB-1AEBD5 | CAMB-785C8  | CAMB-7FCBD | -          |
| CAMB-1ADC00 | CAMB-78601  | CAMB-7FD32 | -          |
| CAMB-1AED1B | CAMB-78838  | CAMB-7FD6F | -          |
| CAMB-1B12AD | CAMB-788ED  | CAMB-80AFB | -          |
| CAMB-1B000E | CAMB-79934  | CAMB-80FDE | -          |

1 **COG-UK authors**

2 **Funding acquisition, leadership, supervision, metadata curation, project administration,**  
3 **samples, logistics, Sequencing, analysis, and Software and analysis tools:**

4 Dr Thomas R Connor PhD<sup>33, 34</sup>, and Professor Nicholas J Loman PhD<sup>15</sup>.

5

6 **Leadership, supervision, sequencing, analysis, funding acquisition, metadata curation,**  
7 **project administration, samples, logistics, and visualisation:**

8 Dr Samuel C Robson Ph.D <sup>68</sup>.

9

10 **Leadership, supervision, project administration, visualisation, samples, logistics, metadata**  
11 **curation and software and analysis tools:**

12 Dr Tanya Golubchik PhD <sup>27</sup>.

13

14 **Leadership, supervision, metadata curation, project administration, samples, logistics**  
15 **sequencing and analysis:**

16 Dr M. Estee Torok FRCP <sup>8, 10</sup>.

17

18 **Project administration, metadata curation, samples, logistics, sequencing, analysis, and**  
19 **software and analysis tools:**

20 Dr William L Hamilton PhD <sup>8, 10</sup>.

21

22 **Leadership, supervision, samples logistics, project administration, funding acquisition**  
23 **sequencing and analysis:**

24 Dr David Bonsall PhD <sup>27</sup>.

25

26 **Leadership and supervision, sequencing, analysis, funding acquisition, visualisation and**  
27 **software and analysis tools:**

28 Dr Ali R Awan PhD <sup>74</sup>.

29

30 **Leadership and supervision, funding acquisition, sequencing, analysis, metadata curation,**  
31 **samples and logistics:**

32 Dr Sally Corden PhD <sup>33</sup>.

33

34 **Leadership supervision, sequencing analysis, samples, logistics, and metadata curation:**

35 Professor Ian Goodfellow PhD <sup>11</sup>.

36

37 **Leadership, supervision, sequencing, analysis, samples, logistics, and Project**  
38 **administration:**

39 Professor Darren L Smith PhD <sup>60, 61</sup>.

40

41 **Project administration, metadata curation, samples, logistics, sequencing and analysis:**

42 Dr Martin D Curran PhD <sup>14</sup>, and Dr Surendra Parmar PhD <sup>14</sup>.

43

44 **Samples, logistics, metadata curation, project administration sequencing and analysis:**

45 Dr James G Shepherd MBChB MRCP <sup>21</sup>.

46

- 1 **Sequencing, analysis, project administration, metadata curation and software and analysis**  
2 **tools:**  
3 Dr Matthew D Parker PhD <sup>38</sup>.  
4
- 5 **Leadership, supervision, funding acquisition, samples, logistics, and metadata curation:**  
6 Dr Catherine Moore<sup>33</sup>.  
7
- 8 **Leadership, supervision, metadata curation, samples, logistics, sequencing and analysis:**  
9 Dr Derek J Fairley PhD <sup>6,88</sup>, Professor Matthew W Loose PhD <sup>54</sup>, and Joanne Watkins MSc <sup>33</sup>.  
10
- 11 **Metadata curation, sequencing, analysis, leadership, supervision and software and**  
12 **analysis tools:**  
13 Dr Matthew Bull PhD<sup>33</sup>, and Dr Sam Nicholls PhD <sup>15</sup>.  
14
- 15 **Leadership, supervision, visualisation, sequencing, analysis and software and analysis**  
16 **tools:**  
17 Professor David M Aanensen PhD <sup>1,30</sup>.  
18
- 19 **Sequencing, analysis, samples, logistics, metadata curation, and visualisation:**  
20 Dr Sharon Glaysher <sup>70</sup>.  
21
- 22 **Metadata curation, sequencing, analysis, visualisation, software and analysis tools:**  
23 Dr Matthew Bashton PhD <sup>60</sup>, and Dr Nicole Pacchiarini PhD <sup>33</sup>.  
24
- 25 **Sequencing, analysis, visualisation, metadata curation, and software and analysis tools:**  
26 Dr Anthony P Underwood PhD <sup>1,30</sup>.  
27
- 28 **Funding acquisition, leadership, supervision and project administration:**  
29 Dr Thushan I de Silva PhD <sup>38</sup>, and Dr Dennis Wang PhD <sup>38</sup>.  
30
- 31 **Project administration, samples, logistics, leadership and supervision:**  
32 Dr Monique Andersson PhD <sup>28</sup>, Professor Anoop J Chauhan <sup>70</sup>, Dr Mariateresa de Cesare  
33 PhD<sup>26</sup>, Dr Catherine Ludden <sup>1,3</sup>, and Dr Tabitha W Mahungu FRCPATH <sup>91</sup>.  
34
- 35 **Sequencing, analysis, project administration and metadata curation:**  
36 Dr Rebecca Dewar PhD <sup>20</sup>, and Martin P McHugh MSc<sup>20</sup>.  
37
- 38 **Samples, logistics, metadata curation and project administration:**  
39 Dr Natasha G Jesudason MBChB MRCP FRCPATH <sup>21</sup>, Dr Kathy K Li MBBCh FRCPATH <sup>21</sup>, Dr Rajiv  
40 N Shah BMBS MRCP MSc <sup>21</sup>, and Dr Yusri Taha MD, PhD <sup>66</sup>.  
41
- 42 **Leadership, supervision, funding acquisition and metadata curation:**  
43 Dr Kate E Templeton PhD <sup>20</sup>.  
44
- 45 **Leadership, supervision, funding acquisition, sequencing and analysis:**  
46 Dr Simon Cottrell PhD <sup>33</sup>, Dr Justin O'Grady PhD <sup>51</sup>, Professor Andrew Rambaut DPhil <sup>19</sup>, and

1 Professor Colin P Smith PhD<sup>93</sup>.  
2  
3 **Leadership, supervision, metadata curation, sequencing and analysis:**  
4 Professor Matthew T.G. Holden PhD <sup>87</sup>, and Professor Emma C Thomson PhD/FRCP <sup>21</sup>.  
5  
6 **Leadership, supervision, samples, logistics and metadata curation:**  
7 Dr Samuel Moses MD <sup>81,82</sup>.  
8  
9 **Sequencing, analysis, leadership, supervision, samples and logistics:**  
10 Dr Meera Chand <sup>7</sup>, Dr Chrystala Constantinidou PhD <sup>71</sup>, Professor Alistair C Darby PhD <sup>46</sup>,  
11 Professor Julian A Hiscox PhD <sup>46</sup>, Professor Steve Paterson PhD <sup>46</sup>, and Dr Meera  
12 Unnikrishnan PhD <sup>71</sup>.  
13  
14 **Sequencing, analysis, leadership and supervision and software and analysis tools:**  
15 Dr Andrew J Page PhD <sup>51</sup>, and Dr Erik M Volz PhD<sup>96</sup>.  
16  
17 **Samples, logistics, sequencing, analysis and metadata curation:**  
18 Dr Charlotte J Houldcroft PhD <sup>8</sup>, Dr Aminu S Jahun PhD <sup>11</sup>, Dr James P McKenna PhD <sup>88</sup>, Dr  
19 Luke W Meredith PhD <sup>11</sup>, Dr Andrew Nelson PhD <sup>61</sup>, Sarojini Pandey MSc <sup>72</sup>, and Dr Gregory R  
20 Young PhD <sup>60</sup>.  
21  
22 **Sequencing, analysis, metadata curation, and software and analysis tools:**  
23 Dr Anna Price PhD<sup>34</sup>, Dr Sara Rey PhD <sup>33</sup>, Dr Sunando Roy PhD <sup>41</sup>, Dr Ben Temperton Ph.D <sup>49</sup>,  
24 and Matthew Wyles <sup>38</sup>.  
25  
26 **Sequencing, analysis, metadata curation and visualisation:**  
27 Stefan Rooke MSc<sup>19</sup>, and Dr Sharif Shaaban PhD<sup>87</sup>.  
28  
29 **Visualisation, sequencing, analysis and software and analysis tools:**  
30 Dr Helen Adams PhD <sup>35</sup>, Dr Yann Bourgeois Ph.D <sup>69</sup>, Dr Katie F Loveson Ph.D <sup>68</sup>, Áine O'Toole  
31 MSc<sup>19</sup>, and Richard Stark MSc <sup>71</sup>.  
32  
33 **Project administration, leadership and supervision:**  
34 Dr Ewan M Harrison PhD <sup>1,3</sup>, David Heyburn <sup>33</sup>, and Professor Sharon J Peacock <sup>2,3</sup>  
35  
36 **Project administration and funding acquisition:**  
37 Dr David Buck PhD<sup>26</sup>, and Michaela John BSc Hons <sup>36</sup>  
38  
39 **Sequencing, analysis and project administration:**  
40 Dorota Jamrozy <sup>1</sup>, and Dr Joshua Quick PhD <sup>15</sup>  
41  
42 **Samples, logistics, and project administration:**  
43 Dr Rahul Batra MD<sup>78</sup>, Katherine L Bellis BSc (Hons) <sup>1,3</sup>, Beth Blane BSc <sup>3</sup>, Sophia T Girgis MSc  
44 <sup>3</sup>, Dr Angie Green PhD <sup>26</sup>, Anita Justice MSc <sup>28</sup>, Dr Mark Kristiansen PhD <sup>41</sup>, and Dr Rachel J  
45 Williams PhD <sup>41</sup>.  
46  
47

1 **Project administration, software and analysis tools:**

2 Radoslaw Poplawski BSc <sup>15</sup>.

3

4 **Project administration and visualisation:**

5 Dr Garry P Scarlett Ph.D<sup>69</sup>.

6

7 **Leadership, supervision, and funding acquisition:**

8 Professor John A Todd PhD <sup>26</sup>, Dr Christophe Fraser PhD <sup>27</sup>, Professor Judith Breuer MD <sup>40,41</sup>,  
9 Professor Sergi Castellano PhD <sup>41</sup>, Dr Stephen L Michell PhD <sup>49</sup>, Professor Dimitris  
10 Gramatopoulos PhD, FRCPath<sup>73</sup>, and Dr Jonathan Edgeworth PhD, FRCPath <sup>78</sup>.

11

12 **Leadership, supervision and metadata curation:**

13 Dr Gemma L Kay PhD <sup>51</sup>.

14

15 **Leadership, supervision, sequencing and analysis:**

16 Dr Ana da Silva Filipe PhD <sup>21</sup>, Dr Aaron R Jeffries PhD <sup>49</sup>, Dr Sascha Ott PhD <sup>71</sup>, Professor  
17 Oliver Pybus <sup>24</sup>, Professor David L Robertson PhD <sup>21</sup>, Dr David A Simpson PhD <sup>6</sup>, and Dr Chris  
18 Williams MB BS<sup>33</sup>.

19

20 **Samples, logistics, leadership and supervision:**

21 Dr Cressida Auckland FRCPath <sup>50</sup>, Dr John Boyes MBChB<sup>83</sup>, Dr Samir Dervisevic FRCPath<sup>52</sup>,  
22 Professor Sian Ellard FRCPath<sup>49, 50</sup>, Dr Sonia Goncalves<sup>1</sup>, Dr Emma J Meader FRCPath <sup>51</sup>, Dr  
23 Peter Muir PhD<sup>2</sup>, Dr Husam Osman PhD <sup>95</sup>, Reenesh Prakash MPH<sup>52</sup>, Dr Venkat Sivaprakasam  
24 PhD<sup>18</sup>, and Dr Ian B Vipond PhD<sup>2</sup>.

25

26 **Leadership, supervision and visualisation**

27 Dr Jane AH Masoli MBChB <sup>49, 50</sup>.

28

29 **Sequencing, analysis and metadata curation**

30 Dr Nabil-Fareed Alikhan PhD <sup>51</sup>, Matthew Carlile BSc <sup>54</sup>, Dr Noel Craine DPhil <sup>33</sup>, Dr Sam T  
31 Haldenby PhD <sup>46</sup>, Dr Nadine Holmes PhD <sup>54</sup>, Professor Ronan A Lyons MD <sup>37</sup>, Dr Christopher  
32 Moore PhD <sup>54</sup>, Malorie Perry MSc <sup>33</sup>, Dr Ben Warne MRCP<sup>80</sup>, and Dr Thomas Williams MD <sup>19</sup>.

33

34 **Samples, logistics and metadata curation:**

35 Dr Lisa Berry PhD <sup>72</sup>, Dr Andrew Bosworth PhD <sup>95</sup>, Dr Julianne Rose Brown PhD<sup>40</sup>, Sharon  
36 Campbell MSc <sup>67</sup>, Dr Anna Casey PhD<sup>17</sup>, Dr Gemma Clark PhD <sup>56</sup>, Jennifer Collins BSc <sup>66</sup>, Dr  
37 Alison Cox PhD <sup>43, 44</sup>, Thomas Davis MSc <sup>84</sup>, Gary Eltringham BSc <sup>66</sup>, Dr Cariad Evans <sup>38, 39</sup>, Dr  
38 Clive Graham MD <sup>64</sup>, Dr Fenella Halstead PhD <sup>18</sup>, Dr Kathryn Ann Harris PhD <sup>40</sup>, Dr  
39 Christopher Holmes PhD <sup>58</sup>, Stephanie Hutchings <sup>2</sup>, Professor Miren Iturriza-Gomara PhD <sup>46</sup>  
40 , Dr Kate Johnson <sup>38, 39</sup>, Katie Jones MSc <sup>72</sup>, Dr Alexander J Keeley MRCP <sup>38</sup>, Dr Bridget A  
41 Knight PhD <sup>49, 50</sup>, Cherian Koshy MSc, CSci, FIBMS <sup>90</sup>, Steven Liggett <sup>63</sup>, Hannah Lowe MSc <sup>81</sup>  
42 , Dr Anita O Lucaci PhD <sup>46</sup>, Dr Jessica Lynch PhD MBChB <sup>25, 29</sup>, Dr Patrick C McClure PhD <sup>55</sup>,  
43 Dr Nathan Moore MBChB <sup>31</sup>, Matilde Mori BSc <sup>25, 29, 32</sup>, Dr David G Partridge FRCP, FRCPath  
44 <sup>38, 39</sup>, Pinglawathee Madona <sup>43, 44</sup>, Hannah M Pymont MSc <sup>2</sup>, Dr Paul Anthony Randell  
45 MBBCh <sup>43, 44</sup>, Dr Mohammad Raza <sup>38, 39</sup>, Felicity Ryan MSc <sup>81</sup>, Dr Robert Shaw FRCPath <sup>28</sup>,  
46 Dr Tim J Sloan PhD <sup>57</sup>, and Emma Swindells BSc <sup>65</sup>.

47

1 **Sequencing, analysis, Samples and logistics:**

2 Alexander Adams BSc<sup>33</sup>, Dr Hibo Asad PhD<sup>33</sup>, Alec Birchley MSc<sup>33</sup>, Tony Thomas Brooks BSc  
3 (Hons)<sup>41</sup>, Dr Giselda Bucca PhD<sup>93</sup>, Ethan Butcher<sup>70</sup>, Dr Sarah L Caddy PhD<sup>13</sup>, Dr Laura G  
4 Caller PhD<sup>2,3,12</sup>, Yasmin Chaudhry BSc<sup>11</sup>, Jason Coombes BSc (HONS)<sup>33</sup>, Michelle Cronin<sup>33</sup>,  
5 Patricia L Dyal MPhil<sup>41</sup>, Johnathan M Evans MSc<sup>33</sup>, Laia Fina<sup>33</sup>, Bree Gatica-Wilcox MPhil<sup>33</sup>,  
6 Dr Iliana Georgana PhD<sup>11</sup>, Lauren Gilbert A-Levels<sup>33</sup>, Lee Graham BSc<sup>33</sup>, Danielle C Groves  
7 BA<sup>38</sup>, Grant Hall BSc<sup>11</sup>, Ember Hilvers MPH<sup>33</sup>, Dr Myra Hosmillo PhD<sup>11</sup>, Hannah Jones<sup>33</sup>,  
8 Sophie Jones MSc<sup>33</sup>, Fahad A Khokhar BSc<sup>13</sup>, Sara Kumziene-Summerhayes MSc<sup>33</sup>,  
9 George MacIntyre-Cockett BSc<sup>26</sup>, Dr Rocio T Martinez Nunez PhD<sup>94</sup>, Dr Caoimhe McKerr  
10 PhD<sup>33</sup>, Dr Claire McMurray PhD<sup>15</sup>, Dr Richard Myers<sup>7</sup>, Yasmin Nicole Panchbhaya BSc<sup>41</sup>,  
11 Malte L Pinckert MPhil<sup>11</sup>, Amy Plimmer<sup>33</sup>, Dr Joanne Stockton PhD<sup>15</sup>, Sarah Taylor<sup>33</sup>, Dr  
12 Alicia Thornton<sup>7</sup>, Amy Trebes MSc<sup>26</sup>, Alexander J Trotter MRes<sup>51</sup>, Helena Jane Tutill BSc<sup>41</sup>  
13 ,Charlotte A Williams BSc<sup>41</sup>, Anna Yakovleva BSc<sup>11</sup> and Dr Wen C Yew PhD<sup>62</sup>.

14

15 **Sequencing, analysis and software and analysis tools:**

16 Dr Mohammad T Alam PhD<sup>71</sup>, Dr Laura Baxter PhD<sup>71</sup>, Olivia Boyd MSc<sup>96</sup>, Dr Fabricia F.  
17 Nascimento PhD<sup>96</sup>, Timothy M Freeman MPhil<sup>38</sup>, Lily Geidelberg MSc<sup>96</sup>, Dr Joseph Hughes  
18 PhD<sup>21</sup>, David Jorgensen MSc<sup>96</sup>, Dr Benjamin B Lindsey MRCP<sup>38</sup>, Dr Richard J Orton PhD<sup>21</sup>,  
19 Dr Manon Ragonnet-Cronin PhD<sup>96</sup> Joel Southgate MSc<sup>33,34</sup>, and Dr Sreenu Vattipally PhD<sup>21</sup>.

20

21 **Samples, logistics and software and analysis tools:**

22 Dr Igor Starinskij MSc MRCP<sup>23</sup>.

23

24 **Visualisation and software and analysis tools:**

25 Dr Joshua B Singer PhD<sup>21</sup>, Dr Khalil Abudahab PhD<sup>1,30</sup>, Leonardo de Oliveira Martins PhD<sup>51</sup>,  
26 Dr Thanh Le-Viet PhD<sup>51</sup>, Mirko Menegazzo<sup>30</sup>, Ben EW Taylor Meng<sup>1,30</sup>, and Dr Corin A  
27 Yeats PhD<sup>30</sup>.

28

29 **Project Administration:**

30 Sophie Palmer<sup>3</sup>, Carol M Churcher<sup>3</sup>, Dr Alisha Davies<sup>33</sup>, Elen De Lacy MSc<sup>33</sup>, Fatima  
31 Downing<sup>33</sup>, Sue Edwards<sup>33</sup>, Dr Nikki Smith PhD<sup>38</sup>, and Dr Frances Bolt PhD<sup>44,45</sup>.

32

33 **Leadership and supervision:**

34 Dr. Alex Alderton<sup>1</sup>, Dr Matt Berriman<sup>1</sup>, Ian G Charles<sup>51</sup>, Dr Nicholas Cortes MBChB<sup>31</sup>, Dr  
35 Tanya Curran PhD<sup>88</sup>, Prof John Danesh<sup>1</sup>, Dr Sahar Eldirdiri MBBS, MSc FRCPATH<sup>84</sup>, Dr Ngozi  
36 Elumogo FRCPATH<sup>52</sup>, Prof Andrew Hattersley FRS<sup>49,50</sup>, Professor Alison Holmes MD<sup>44,45</sup>, Dr  
37 Robin Howe<sup>33</sup>, Dr Rachel Jones<sup>33</sup>, Anita Kenyon MSc<sup>84</sup>, Prof Robert A Kingsley PhD<sup>51</sup>,  
38 Professor Dominic Kwiatkowski<sup>1,9</sup>, Dr Cordelia Langford<sup>1</sup>, Dr Jenifer Mason MBBS<sup>48</sup>, Dr  
39 Alison E Mather PhD<sup>51</sup>, Lizzie Meadows MA<sup>51</sup>, Dr Sian Morgan FRCPATH<sup>36</sup>, Dr James Price  
40 PhD<sup>44,45</sup>, Trevor I Robinson MSc<sup>48</sup>, Dr Giri Shankar<sup>33</sup>, John Wain<sup>51</sup>, and Dr Mark A  
41 Webber PhD<sup>51</sup>.

42

43 **Metadata curation:**

44 Dr Declan T Bradley PhD<sup>5,6</sup>, Dr Michael R Chapman PhD<sup>1,3,4</sup>, Dr Derrick Crooke<sup>28</sup>, Dr David  
45 Eyre PhD<sup>28</sup>, Professor Martyn Guest PhD<sup>34</sup>, Huw Gulliver<sup>34</sup>, Dr Sarah Hoosdally<sup>28</sup>, Dr  
46 Christine Kitchen PhD<sup>34</sup>, Dr Ian Merrick PhD<sup>34</sup>, Siddharth Mookerjee MPH<sup>44,45</sup>, Robert  
47 Munn BSc<sup>34</sup>, Professor Timothy Peto PhD<sup>28</sup>, Will Potter<sup>52</sup>, Dr Dheeraj K Sethi MBBS<sup>52</sup>,



1 Wendy Smith<sup>56</sup>, Dr Luke B Snell MB BS<sup>75,94</sup>, Dr Rachael Stanley PhD<sup>52</sup>, Claire Stuart<sup>52</sup> and  
2 Dr Elizabeth Wastenge MD<sup>20</sup>.

3

#### 4 **Sequencing and analysis:**

5 Dr Erwan Acheson PhD<sup>6</sup>, Safiah Afifi BSc<sup>36</sup>, Dr Elias Allara MD PhD<sup>2,3</sup>, Dr Roberto Amato<sup>1</sup>,  
6 Dr Adrienn Angyal PhD<sup>38</sup>, Dr Elihu Aranday-Cortes PhD/DVM<sup>21</sup>, Cristina Ariani<sup>1</sup>, Jordan  
7 Ashworth<sup>19</sup>, Dr Stephen Attwood<sup>24</sup>, Alp Aydin MSc<sup>51</sup>, David J Baker BEng<sup>51</sup>, Dr Carlos E  
8 Balcazar PhD<sup>19</sup>, Angela Beckett MSc<sup>68</sup> Robert Beer BSc<sup>36</sup>, Dr Gilberto Betancor PhD<sup>76</sup>,  
9 Emma Betteridge<sup>1</sup>, Dr David Bibby<sup>7</sup>, Dr Daniel Bradshaw<sup>7</sup>, Catherine Bresner BSc(Hons)  
10<sup>34</sup>, Dr Hannah E Bridgewater PhD<sup>71</sup>, Alice Broos BSc (Hons)<sup>21</sup>, Dr Rebecca Brown PhD<sup>38</sup>, Dr  
11 Paul E Brown PhD<sup>71</sup>, Dr Kirstyn Bruncker PhD<sup>22</sup>, Dr Stephen N Carmichael PhD<sup>21</sup>, Jeffrey K.  
12 J. Cheng MSc<sup>71</sup>, Dr Rachel Colquhoun DPhil<sup>19</sup>, Dr Gavin Dabrera<sup>7</sup>, Dr Johnny Debebe PhD  
13<sup>54</sup>, Eleanor Drury<sup>1</sup>, Dr Louis du Plessis<sup>24</sup>, Richard Eccles MSc<sup>46</sup>, Dr Nicholas Ellaby<sup>7</sup>, Audrey  
14 Farbos MSc<sup>49</sup>, Ben Farr<sup>1</sup>, Dr Jacqueline Findlay PhD<sup>41</sup>, Chloe L Fisher MSc<sup>74</sup>, Leysa Marie  
15 Forrest MSc<sup>41</sup>, Dr Sarah Francois<sup>24</sup>, Lucy R. Frost BSc<sup>71</sup>, William Fuller BSc<sup>34</sup>, Dr Eileen  
16 Gallagher<sup>7</sup>, Dr Michael D Gallagher PhD<sup>19</sup>, Matthew Gemmell MSc<sup>46</sup>, Dr Rachel AJ Gilroy  
17 PhD<sup>51</sup>, Scott Goodwin<sup>1</sup>, Dr Luke R Green PhD<sup>38</sup>, Dr Richard Gregory PhD<sup>46</sup>, Dr Natalie  
18 Groves<sup>7</sup>, Dr James W Harrison PhD<sup>49</sup>, Hassan Hartman<sup>7</sup>, Dr Andrew R Hesketh PhD<sup>93</sup>, Verity  
19 Hill<sup>19</sup>, Dr Jonathan Hubb<sup>7</sup>, Dr Margaret Hughes PhD<sup>46</sup>, Dr David K Jackson<sup>1</sup>, Dr Ben Jackson  
20 PhD<sup>19</sup>, Dr Keith James<sup>1</sup>, Natasha Johnson BSc (Hons)<sup>21</sup>, Ian Johnston<sup>1</sup>, Jon-Paul Keatley<sup>1</sup>, Dr  
21 Moritz Kraemer<sup>24</sup>, Dr Angie Lackenby<sup>7</sup>, Dr Mara Lawniczak<sup>1</sup>, Dr David Lee<sup>7</sup>, Rich Livett<sup>1</sup>,  
22 Stephanie Lo<sup>1</sup>, Daniel Mair BSc (Hons)<sup>21</sup>, Joshua Maksimovic FD sport science<sup>36</sup>, Nikos  
23 Manesis<sup>7</sup>, Dr Robin Manley Ph.D<sup>49</sup>, Dr Carmen Manso<sup>7</sup>, Dr Angela Marchbank BSc<sup>34</sup>, Dr  
24 Inigo Martincorena<sup>1</sup>, Dr Tamyo Mbisa<sup>7</sup>, Kathryn McCluggage MSc<sup>36</sup>, Dr JT McCrone PhD<sup>19</sup>,  
25 Shahjahan Miah<sup>7</sup>, Michelle L Michelsen BSc<sup>49</sup>, Dr Mari Morgan PhD<sup>33</sup>, Dr Gaia Nebbia  
26 PhD, FRCPath<sup>78</sup>, Charlotte Nelson MSc<sup>46</sup>, Jenna Nichols BSc (Hons)<sup>21</sup>, Dr Paola Niola PhD<sup>41</sup>  
27, Dr Kyriaki Nomikou PhD<sup>21</sup>, Steve Palmer<sup>1</sup>, Dr. Naomi Park<sup>1</sup>, Dr Yasmin A Parr PhD<sup>21</sup>, Dr  
28 Paul J Parsons PhD<sup>38</sup>, Vineet Patel<sup>7</sup>, Dr. Minal Patel<sup>1</sup>, Clare Pearson MSc<sup>2,1</sup>, Dr Steven Platt  
29<sup>7</sup>, Christoph Puethe<sup>1</sup>, Dr. Mike Quail<sup>1</sup>, Dr Jayna Raghvani<sup>24</sup>, Dr Lucille Rainbow PhD<sup>46</sup>  
30, Shavanthi Rajatileka<sup>1</sup>, Dr Mary Ramsay<sup>7</sup>, Dr Paola C Resende Silva PhD<sup>41,42</sup>, Steven Rudder  
31<sup>51</sup>, Dr Chris Ruis<sup>3</sup>, Dr Christine M Sambles PhD<sup>49</sup>, Dr Fei Sang PhD<sup>54</sup>, Dr Ulf Schaefer<sup>7</sup>, Dr  
32 Emily Scher PhD<sup>19</sup>, Dr. Carol Scott<sup>1</sup>, Lesley Shirley<sup>1</sup>, Adrian W Signell BSc<sup>76</sup>, John Sillitoe<sup>1</sup>  
33, Christen Smith<sup>1</sup>, Dr Katherine L Smollett PhD<sup>21</sup>, Karla Spellman FD<sup>36</sup>, Thomas D Stanton  
34 BSc<sup>19</sup>, Dr David J Studholme PhD<sup>49</sup>, Ms Grace Taylor-Joyce BSc<sup>71</sup>, Dr Ana P Tedim PhD<sup>51</sup>  
35, Dr Thomas Thompson PhD<sup>6</sup>, Dr Nicholas M Thomson PhD<sup>51</sup>, Scott Thurston<sup>1</sup>, Lily Tong PhD  
36<sup>21</sup>, Gerry Tonkin-Hill<sup>1</sup>, Rachel M Tucker MSc<sup>38</sup>, Dr Edith E Vamos PhD<sup>4</sup>, Dr Tetyana  
37 Vasylyeva<sup>24</sup>, Joanna Warwick-Dugdale BSc<sup>49</sup>, Danni Weldon<sup>1</sup>, Dr Mark Whitehead PhD<sup>46</sup>  
38, Dr David Williams<sup>7</sup>, Dr Kathleen A Williamson PhD<sup>19</sup>, Harry D Wilson BSc<sup>76</sup>, Trudy Workman  
39 HNC<sup>34</sup>, Dr Muhammad Yasir PhD<sup>51</sup>, Dr Xiaoyu Yu PhD<sup>19</sup>, and Dr Alex Zarebski<sup>24</sup>.

40

#### 41 **Samples and logistics:**

42 Dr Evelien M Adriaenssens PhD<sup>51</sup>, Dr Shazaad S Y Ahmad MSc<sup>2,47</sup>, Adela Alcolea-Medina  
43 MPharm<sup>59,77</sup>, Dr John Allan PhD<sup>60</sup>, Dr Patawee Asamaphan PhD<sup>21</sup>, Laura Atkinson MSc<sup>40</sup>,  
44 Paul Baker MD<sup>63</sup>, Professor Jonathan Ball PhD<sup>55</sup>, Dr Edward Barton MD<sup>64</sup>, Dr. Mathew A  
45 Beale<sup>1</sup>, Dr. Charlotte Beaver<sup>1</sup>, Dr Andrew Beggs PhD<sup>16</sup>, Dr Andrew Bell PhD<sup>51</sup>, Duncan J  
46 Berger<sup>1</sup>, Dr Louise Berry<sup>56</sup>, Claire M Bewshea MSc<sup>49</sup>, Kelly Bicknell<sup>70</sup>, Paul Bird<sup>58</sup>, Dr Chloe  
47 Bishop<sup>7</sup>, Dr Tim Boswell<sup>56</sup>, Cassie Breen BSc<sup>48</sup>, Dr Sarah K Buddenborg<sup>1</sup>, Dr Shirelle Burton-

1 Fanning MD <sup>66</sup>, Dr Vicki Chalker <sup>7</sup>, Dr Joseph G Chappell PhD <sup>55</sup>, Themoula Charalampous MSc  
2 <sup>78,94</sup>, Claire Cormie<sup>3</sup>, Dr Nick Cortes PhD<sup>29, 25</sup>, Dr Lindsay J Coupland PhD <sup>52</sup>, Angela Cowell  
3 MSc<sup>48</sup>, Dr Rose K Davidson PhD <sup>53</sup>, Joana Dias MSc<sup>3</sup>, Dr Maria Diaz PhD<sup>51</sup>, Thomas Dibling<sup>1</sup>,  
4 Matthew J Dorman<sup>1</sup>, Dr Nichola Duckworth<sup>57</sup>, Scott Elliott<sup>70</sup>, Sarah Essex<sup>63</sup>, Karlie Fallon <sup>58</sup>,  
5 Theresa Feltwell <sup>8</sup>, Dr Vicki M Fleming PhD <sup>56</sup>, Sally Forrest BSc <sup>3</sup>, Luke Foulser<sup>1</sup>, Maria V  
6 Garcia-Casado<sup>1</sup>, Dr Artemis Gavriil PhD <sup>41</sup>, Dr Ryan P George PhD<sup>47</sup>, Laura Gifford MSc <sup>33</sup>,  
7 Harmeet K Gill PhD<sup>3</sup>, Jane Greenaway MSc<sup>65</sup>, Luke Griffith Bsc<sup>53</sup>, Ana Victoria Gutierrez<sup>51</sup>, Dr  
8 Antony D Hale MBBS<sup>85</sup>, Dr Tanzina Haque FRCPath, PhD<sup>91</sup>, Katherine L Harper MBiol<sup>85</sup>, Dr Ian  
9 Harrison <sup>7</sup>, Dr Judith Heaney PhD<sup>89</sup>, Thomas Helmer <sup>58</sup>, Ellen E Higginson PhD <sup>3</sup>, Richard  
10 Hopes <sup>2</sup>, Dr Hannah C Howson-Wells PhD <sup>56</sup>, Dr Adam D Hunter <sup>1</sup>, Robert Impey <sup>70</sup>, Dr Dianne  
11 Irish-Tavares FRCPath <sup>91</sup>, David A Jackson<sup>1</sup>, Kathryn A Jackson MSc <sup>46</sup>, Dr Amelia Joseph <sup>56</sup>,  
12 Leanne Kane <sup>1</sup>, Sally Kay <sup>1</sup>, Leanne M Kermack MSc <sup>3</sup>, Manjinder Khakh <sup>56</sup>, Dr Stephen P Kidd  
13 PhD<sup>29, 25, 31</sup>, , Dr Anastasia Kolyva PhD <sup>51</sup>, Jack CD Lee BSc <sup>40</sup>, Laura Letchford <sup>1</sup>, Nick Levene  
14 MSc<sup>79</sup>, Dr LisaJ Levett PhD <sup>89</sup>, Dr Michelle M Lister PhD <sup>56</sup>, Allyson Lloyd <sup>70</sup>, Dr Joshua Loh  
15 PhD<sup>60</sup>, Dr Louissa R Macfarlane-Smith PhD<sup>85</sup>, Dr Nicholas W Machin MSc <sup>2, 47</sup>, Mailis Maes  
16 M.phil<sup>3</sup>, Dr Samantha McGuigan <sup>1</sup>, Liz McMinn <sup>1</sup>, Dr Lamia Mestek-Boukhibar D.Phil <sup>41</sup>, Dr  
17 Zoltan Molnar PhD <sup>6</sup>, Lynn Monaghan <sup>79</sup>, Dr Catrin Moore <sup>27</sup>, Plamena Naydenova BSc <sup>3</sup>,  
18 Alexandra S Neaverson <sup>1</sup>, Dr. Rachel Nelson PhD <sup>1</sup>, Marc O Niebel MSc<sup>21</sup>, Elaine O'Toole BSc  
19 <sup>48</sup>, Debra Padgett BSc <sup>64</sup>, Gaurang Patel <sup>1</sup>, Dr Brendan Al Payne MD <sup>66</sup>, Liam Prestwood <sup>1</sup>, Dr  
20 Veena Raviprakash MD<sup>67</sup>, Nicola Reynolds PhD<sup>86</sup> Dr Alex Richter PhD <sup>16</sup>, Dr Esther Robinson  
21 PhD<sup>95</sup>, Dr Hazel A Rogers<sup>1</sup>, Dr Aileen Rowan PhD <sup>96</sup>, Garren Scott BSc <sup>64</sup>, Dr Divya Shah PhD<sup>40</sup>,  
22 Nicola Sheriff BSc <sup>67</sup>, Dr Graciela Sluga MD - MSc<sup>92</sup>, Emily Souster<sup>1</sup>, Dr. Michael Spencer-  
23 Chapman<sup>1</sup>, Sushmita Sridhar BSc<sup>1, 3</sup>, Tracey Swingler <sup>53</sup>, Dr Julian Tang<sup>58</sup>, Professor Graham P  
24 Taylor DSc<sup>96</sup>, Dr Theocharis Tsoleridis PhD<sup>55</sup>, Dr Lance Turtle PhD MRCP<sup>46</sup>, Dr Sarah Walsh <sup>57</sup>,  
25 Dr Michelle Wantoch PhD <sup>86</sup>, Joanne Watts BSc<sup>48</sup>, Dr Sheila Waugh MD<sup>66</sup>, Sam Weeks<sup>41</sup>, Dr  
26 Rebecca Williams BMBS <sup>31</sup>, Dr Iona Willingham<sup>56</sup>, Dr Emma L Wise PhD <sup>25, 29, 31</sup>, Victoria  
27 Wright BSc <sup>54</sup>, Dr Sarah Wyllie <sup>70</sup>, and Jamie Young BSc <sup>3</sup>.

28

## 29 **Software and analysis tools**

30 Amy Gaskin MSc<sup>33</sup>, Dr Will Rowe PhD <sup>15</sup>, and Dr Igor Siveroni PhD<sup>96</sup>.

31

## 32 **Visualisation:**

33 Dr Robert Johnson PhD <sup>96</sup>.

34

35 **1** Wellcome Sanger Institute, **2** Public Health England, **3** University of Cambridge, **4** Health  
36 Data Research UK, Cambridge, **5** Public Health Agency, Northern Ireland, **6** Queen's  
37 University Belfast **7** Public Health England Colindale, **8** Department of Medicine, University  
38 of Cambridge, **9** University of Oxford, **10** Departments of Infectious Diseases and  
39 Microbiology, Cambridge University Hospitals NHS Foundation Trust; Cambridge, UK, **11**  
40 Division of Virology, Department of Pathology, University of Cambridge, **12** The Francis Crick  
41 Institute, **13** Cambridge Institute for Therapeutic Immunology and Infectious Disease,  
42 Department of Medicine, **14** Public Health England, Clinical Microbiology and Public Health  
43 Laboratory, Cambridge, UK, **15** Institute of Microbiology and Infection, University of  
44 Birmingham, **16** University of Birmingham, **17** Queen Elizabeth Hospital, **18** Heartlands  
45 Hospital, **19** University of Edinburgh, **20** NHS Lothian, **21** MRC-University of Glasgow Centre  
46 for Virus Research, **22** Institute of Biodiversity, Animal Health & Comparative Medicine,  
47 University of Glasgow, **23** West of Scotland Specialist Virology Centre, **24** Dept Zoology,

1 University of Oxford, **25** University of Surrey, **26** Wellcome Centre for Human Genetics,  
2 Nuffield Department of Medicine, University of Oxford, **27** Big Data Institute, Nuffield  
3 Department of Medicine, University of Oxford, **28** Oxford University Hospitals NHS  
4 Foundation Trust, **29** Basingstoke Hospital, **30** Centre for Genomic Pathogen Surveillance,  
5 University of Oxford, **31** Hampshire Hospitals NHS Foundation Trust, **32** University of  
6 Southampton, **33** Public Health Wales NHS Trust, **34** Cardiff University, **35** Betsi Cadwaladr  
7 University Health Board, **36** Cardiff and Vale University Health Board, **37** Swansea University,  
8 **38** University of Sheffield, **39** Sheffield Teaching Hospitals, **40** Great Ormond Street NHS  
9 Foundation Trust, **41** University College London, **42** Oswaldo Cruz Institute, Rio de Janeiro  
10 **43** North West London Pathology, **44** Imperial College Healthcare NHS Trust, **45** NIHR Health  
11 Protection Research Unit in HCAI and AMR, Imperial College London, **46** University of  
12 Liverpool, **47** Manchester University NHS Foundation Trust, **48** Liverpool Clinical  
13 Laboratories, **49** University of Exeter, **50** Royal Devon and Exeter NHS Foundation Trust, **51**  
14 Quadram Institute Bioscience, University of East Anglia, **52** Norfolk and Norwich University  
15 Hospital, **53** University of East Anglia, **54** Deep Seq, School of Life Sciences, Queens Medical  
16 Centre, University of Nottingham, **55** Virology, School of Life Sciences, Queens Medical  
17 Centre, University of Nottingham, **56** Clinical Microbiology Department, Queens Medical  
18 Centre, **57** PathLinks, Northern Lincolnshire & Goole NHS Foundation Trust, **58** Clinical  
19 Microbiology, University Hospitals of Leicester NHS Trust, **59** Viapath, **60** Hub for  
20 Biotechnology in the Built Environment, Northumbria University, **61** NU-OMICS  
21 Northumbria University, **62** Northumbria University, **63** South Tees Hospitals NHS  
22 Foundation Trust, **64** North Cumbria Integrated Care NHS Foundation Trust, **65** North Tees  
23 and Hartlepool NHS Foundation Trust, **66** Newcastle Hospitals NHS Foundation Trust, **67**  
24 County Durham and Darlington NHS Foundation Trust, **68** Centre for Enzyme Innovation,  
25 University of Portsmouth, **69** School of Biological Sciences, University of Portsmouth, **70**  
26 Portsmouth Hospitals NHS Trust, **71** University of Warwick, **72** University Hospitals Coventry  
27 and Warwickshire, **73** Warwick Medical School and Institute of Precision Diagnostics,  
28 Pathology, UHCW NHS Trust, **74** Genomics Innovation Unit, Guy's and St. Thomas' NHS  
29 Foundation Trust, **75** Centre for Clinical Infection & Diagnostics Research, St. Thomas'  
30 Hospital and Kings College London, **76** Department of Infectious Diseases, King's College  
31 London, **77** Guy's and St. Thomas' Hospitals NHS Foundation Trust, **78** Centre for Clinical  
32 Infection and Diagnostics Research, Department of Infectious Diseases, Guy's and St  
33 Thomas' NHS Foundation Trust, **79** Princess Alexandra Hospital Microbiology Dept. , **80**  
34 Cambridge University Hospitals NHS Foundation Trust, **81** East Kent Hospitals University NHS  
35 Foundation Trust, **82** University of Kent, **83** Gloucestershire Hospitals NHS Foundation Trust,  
36 **84** Department of Microbiology, Kettering General Hospital, **85** National Infection Service,  
37 PHE and Leeds Teaching Hospitals Trust, **86** Cambridge Stem Cell Institute, University of  
38 Cambridge, **87** Public Health Scotland, **88** Belfast Health & Social Care Trust, **89** Health  
39 Services Laboratories, **90** Barking, Havering and Redbridge University Hospitals NHS Trust,  
40 **91** Royal Free NHS Trust, **92** Maidstone and Tunbridge Wells NHS Trust, **93** University of  
41 Brighton, **94** Kings College London, **95** PHE Heartlands, **96** Imperial College London.  
42
