# Supplementary material for: Genomic epidemiology of COVID-19 in care homes in the East of England
Source: bioRxiv or medRxiv preprint supplement (doi:10.1101/2020.08.26.20182279), 2021-02-15

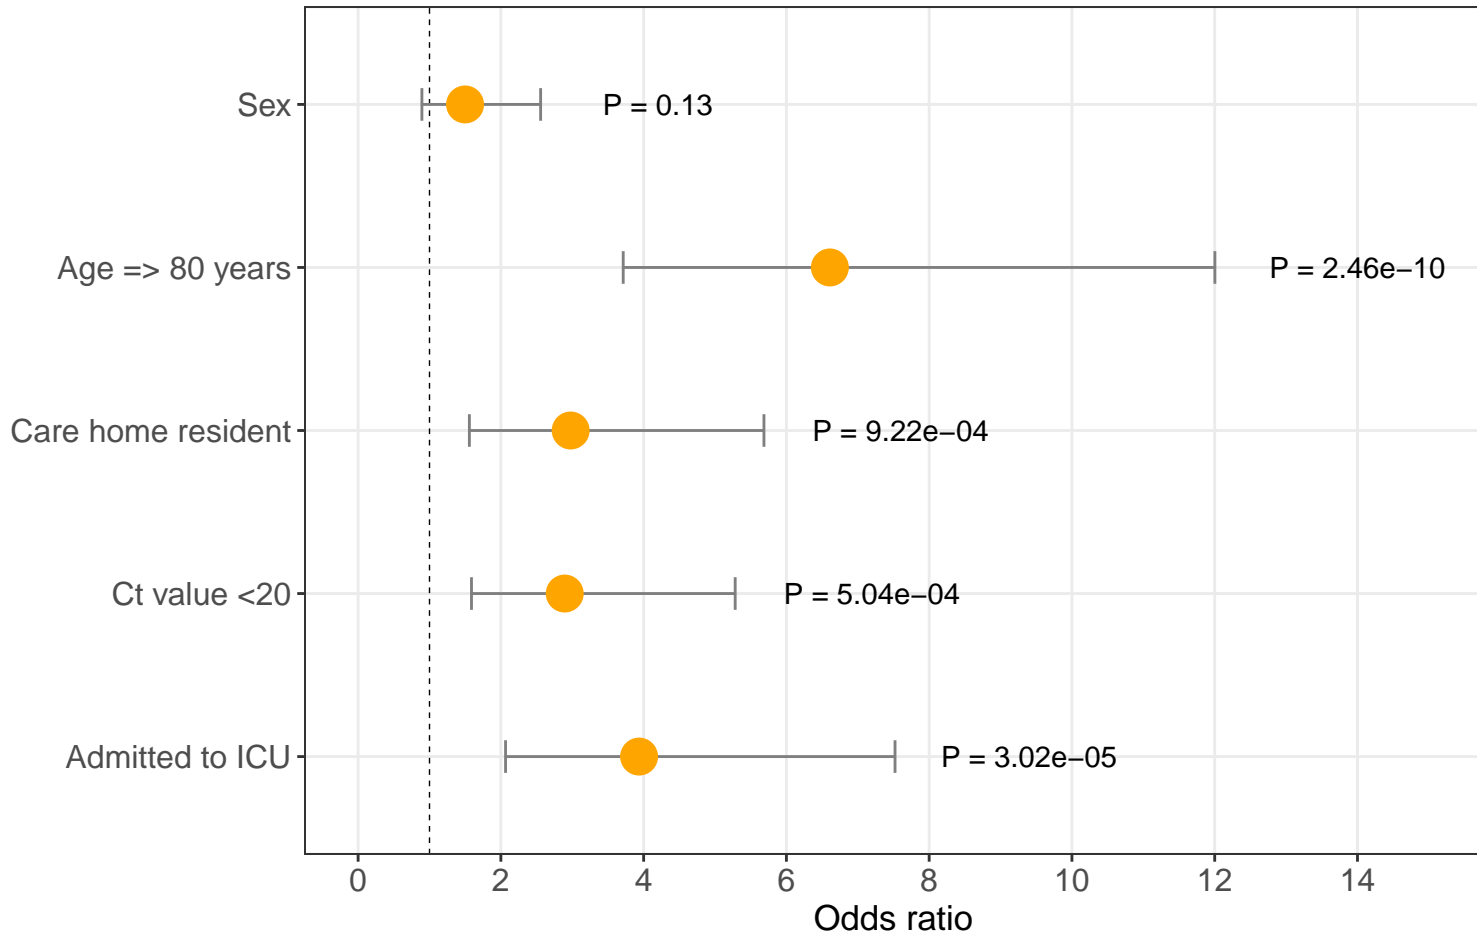

Supplement: Supplementary file [file media-11.pdf]
